# Supplementary material
Source: PubMed Central journal article supplement (PMC3258527)
Supplement: NIHMS60552-supplement-si20050606_022.pdf [file NIHMS60552-supplement-si20050606_022.pdf]

# Synthetic studies towards aryl-(4-aryl-4*H*-[1,2,4]triazole-3-yl)-amine from 1,3-diarylthiourea as urea mimetics

*Amarnath Natarajan,<sup>a</sup> Yuhong Guo,<sup>a</sup> Haribabu Arthanari,<sup>b</sup> Gerhard Wagner,<sup>b</sup> Jose A. Halperin<sup>a</sup> and Michael Chorev<sup>a\*</sup>*

<sup>a</sup>Laboratory for Translational Research, 1 Kendall Square, Bldg. 600 3<sup>rd</sup> Floor, Harvard Medical School, Cambridge, MA 02139. <sup>b</sup>Department of Biological Chemistry and Molecular Pharmacology, Harvard Medical School, Boston, MA 02115  
michael\_chorev@hms.harvard.edu

## CONTENTS

## page no

|                                                                           |       |
|---------------------------------------------------------------------------|-------|
| 1. <sup>1</sup> HNMR of <b>3a</b>                                         | SI-2  |
| 2. <sup>13</sup> CNMR of <b>3a</b>                                        | SI-3  |
| 3. <sup>1</sup> HNMR of <b>3c</b>                                         | SI-4  |
| 4. <sup>13</sup> CNMR of <b>3c</b>                                        | SI-5  |
| 5. <sup>1</sup> HNMR of <b>4a</b>                                         | SI-6  |
| 6. <sup>13</sup> CNMR of <b>4a</b>                                        | SI-7  |
| 7. <sup>1</sup> HNMR of <b>4b</b>                                         | SI-8  |
| 8. <sup>13</sup> CNMR of <b>4b</b>                                        | SI-9  |
| 9. <sup>1</sup> HNMR of <b>4c</b>                                         | SI-10 |
| 10. LCMS of <b>4c</b>                                                     | SI-11 |
| 11. <sup>1</sup> HNMR of <b>4k</b>                                        | SI-12 |
| 12. <sup>13</sup> CNMR of <b>4k</b>                                       | SI-13 |
| 13. <sup>1</sup> HNMR of <b>6c</b>                                        | SI-14 |
| 14. <sup>13</sup> CNMR of <b>6c</b>                                       | SI-15 |
| 15. TOCSY of <b>6c</b>                                                    | SI-16 |
| 16. NOESY of <b>6c</b>                                                    | SI-17 |
| 17. <sup>1</sup> HNMR of <b>6d</b>                                        | SI-18 |
| 18. <sup>13</sup> CNMR of <b>6d</b>                                       | SI-19 |
| 19. <sup>1</sup> HNMR of <b>7d</b>                                        | SI-20 |
| 20. LC of <b>6d</b> and <b>7d</b> pure and mixture                        | SI-21 |
| 21. <sup>1</sup> HNMR of <b>6e</b> & <b>7e</b> mixture and LC integration | SI-22 |
| 22. <sup>1</sup> HNMR of <b>6f</b>                                        | SI-23 |
| 23. <sup>13</sup> CNMR of <b>6f</b>                                       | SI-24 |
| 24. TOCSY of <b>6f</b>                                                    | SI-25 |
| 25. NOESY of <b>6f</b>                                                    | SI-26 |
| 26. TOCSY of <b>6g</b>                                                    | SI-27 |
| 27. General methods for the synthesis of [1,2,4]triazoles                 | SI-28 |

Pulse Sequence: s2pu1  
Solvent: DMSO  
Temp. 20.0 C / 293.1 K  
Mercury-400BB "mercury400"

Relax. delay 0.120 sec  
Pulse 40.2 degrees  
Acq. time 2.733 sec  
Width 5995.2 Hz  
8 repetitions  
OBSERVE H1, 400.0248424 MHz  
DATA PROCESSING  
Line broadening 0.1 Hz  
FT size 32768  
Total time 0 min, 37 sec

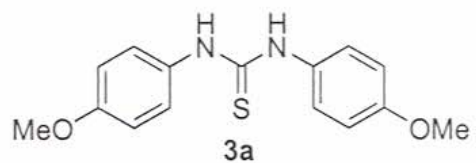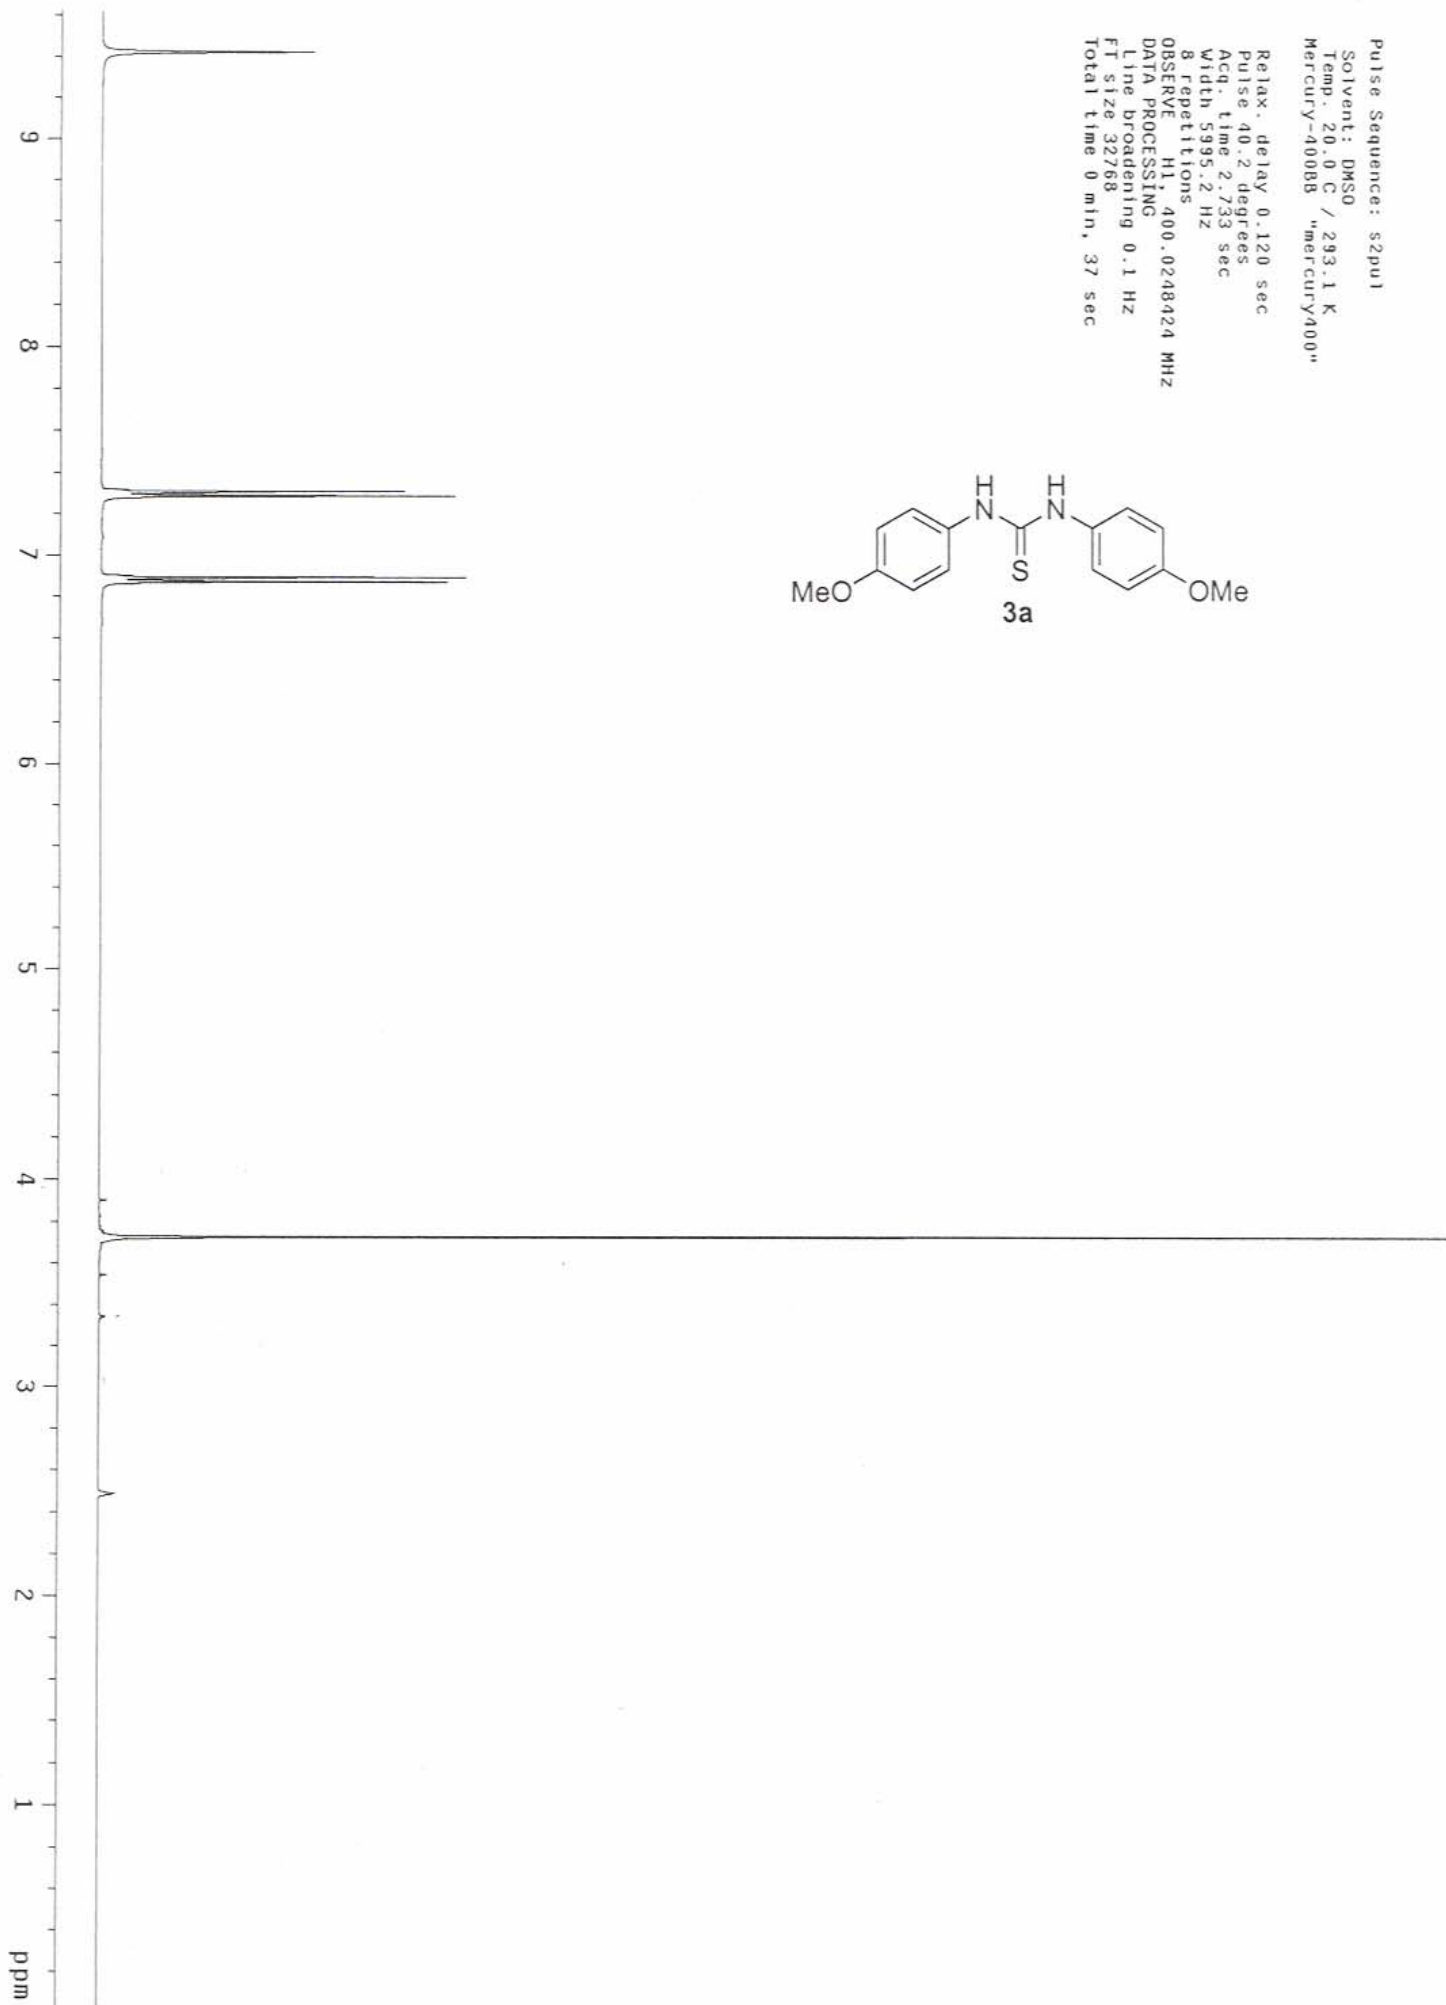

13C OBSERVE

Pulse Sequence: s2pul

Solvent: DMSO

Temp. 22.0 C / 295.1 K

Mercury-400BB "mercury400"

Pulse 42.5 degrees

Acq. time 1.311 sec

Width 25000.0 Hz

Reference

OBSERVE C13, 100.5863026 MHz

DECUPLE H1, 400.0268647 MHz

Power 48 dB

continuously on

WALTZ-16 modulated

DATA PROCESSING

Line broadening 1.0 Hz

FT size 65536

Total time 5 min, 2 sec

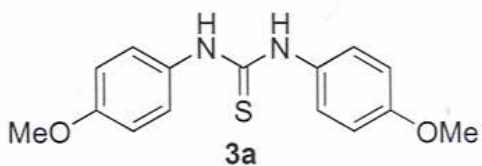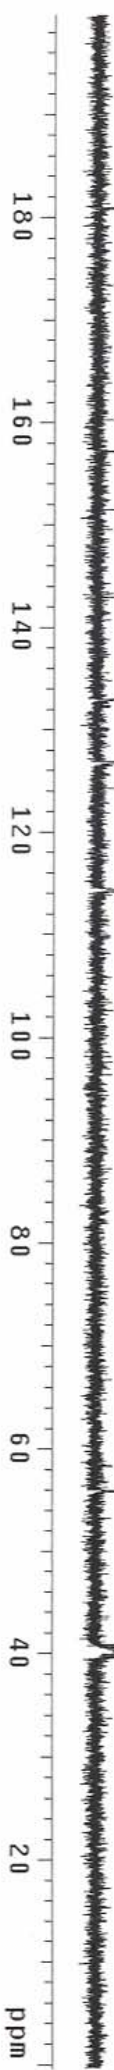

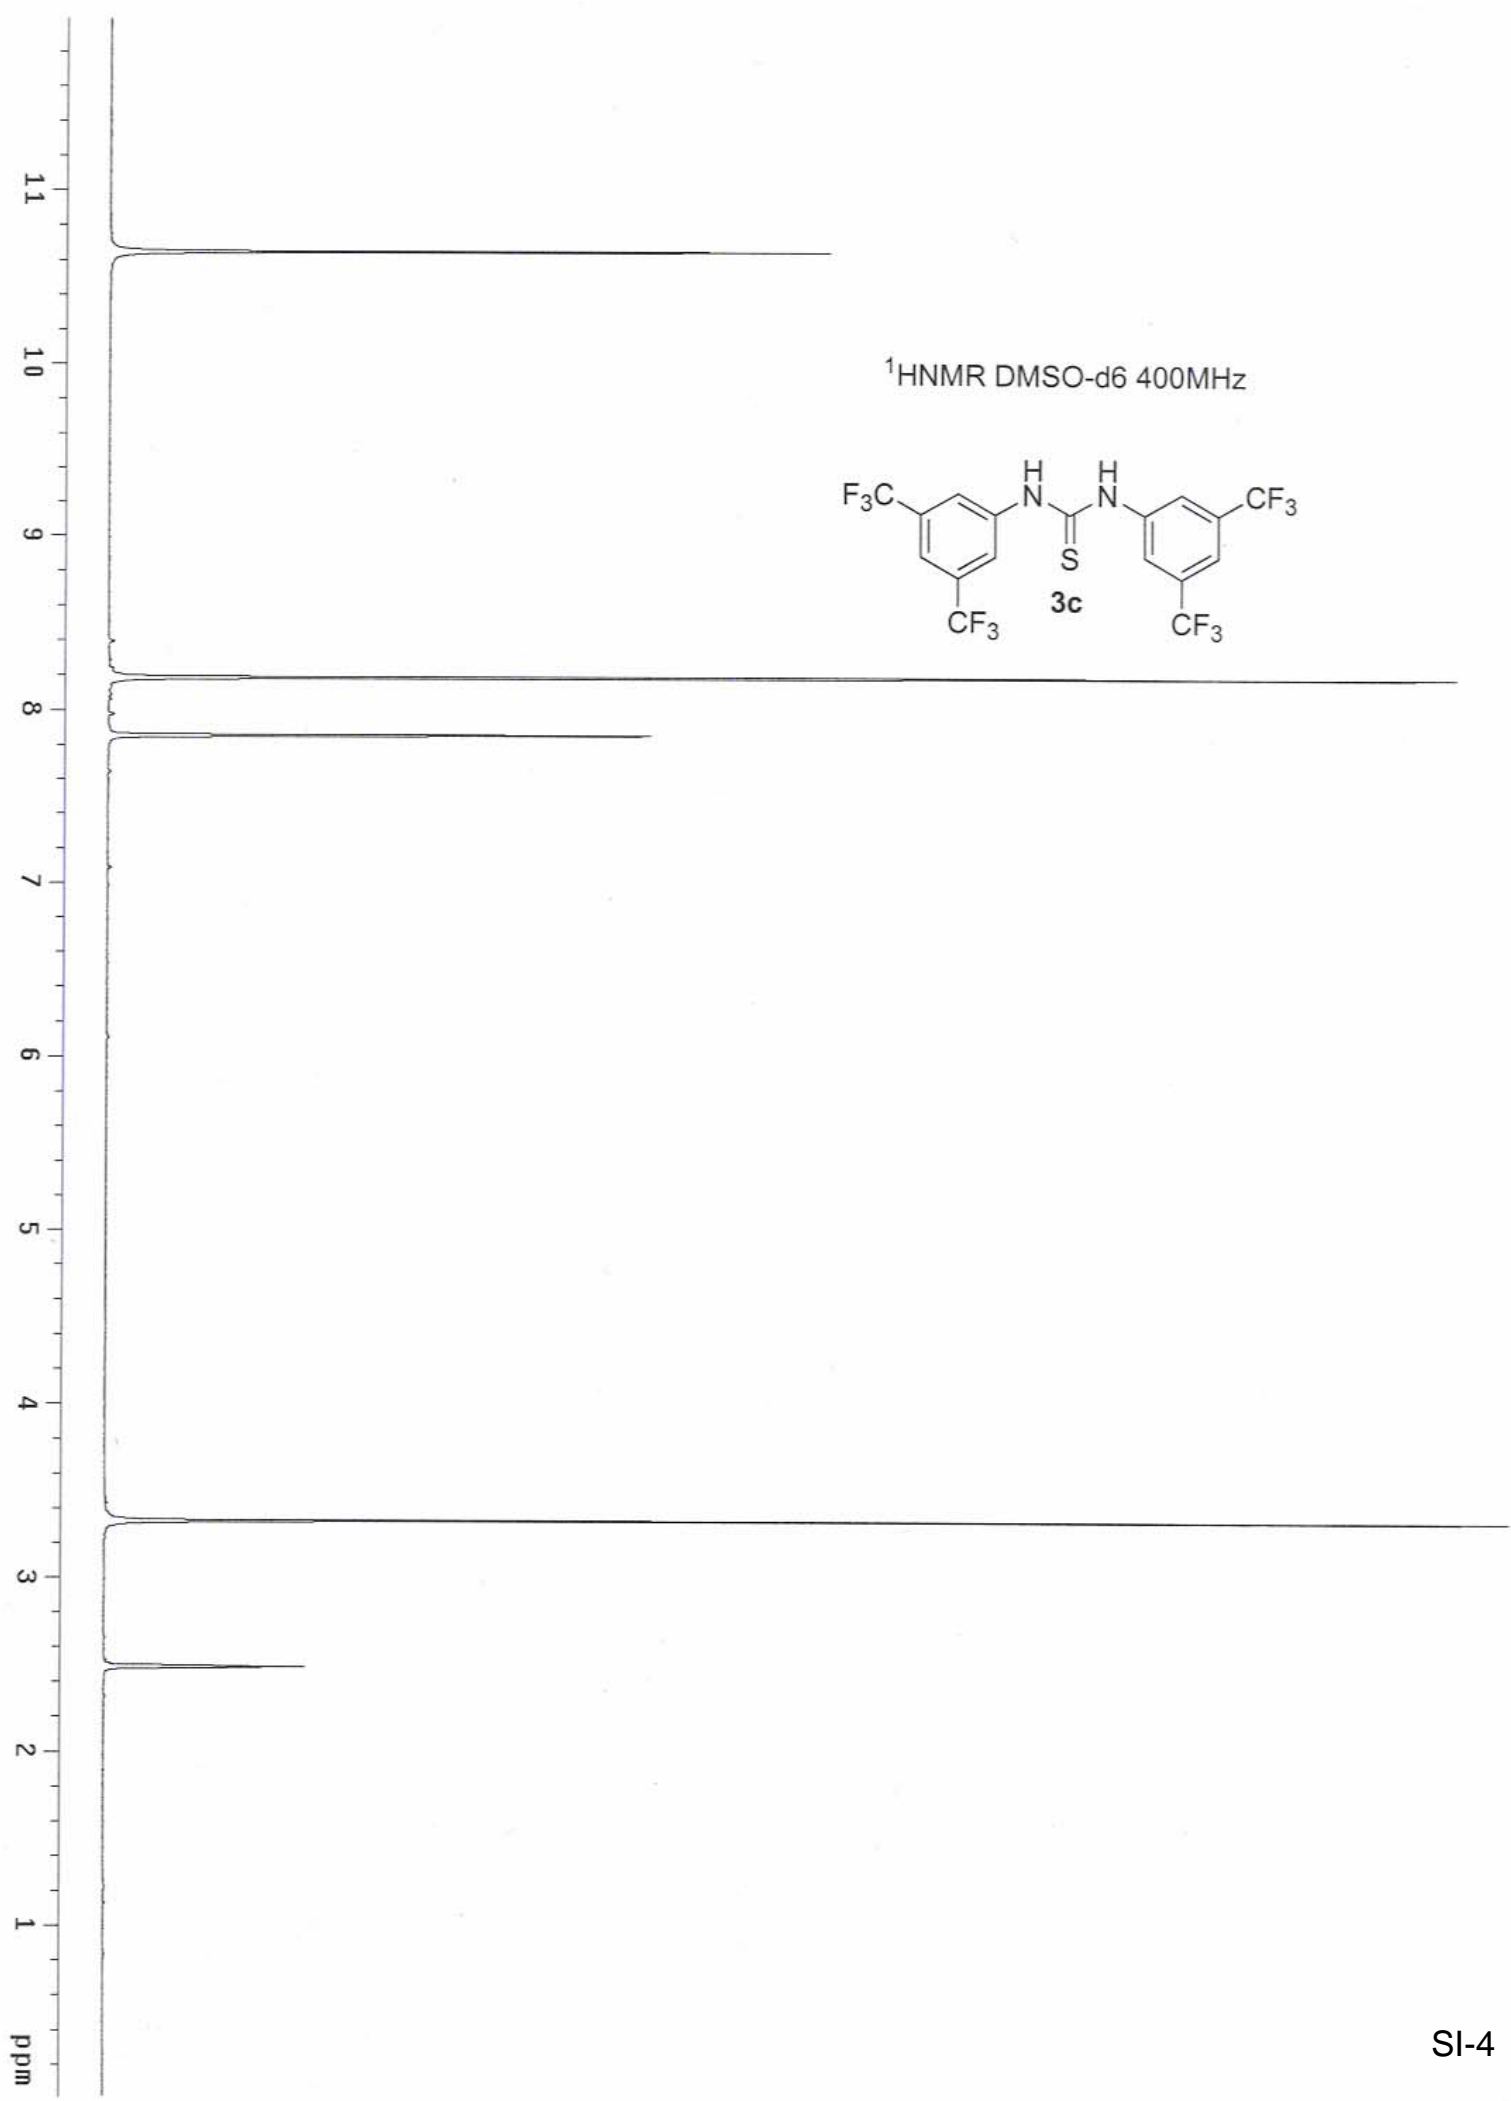

LC - Xterra C18 5 $\mu$ M 3.0  $\times$  100.0 mm column  
 APCI positive MS

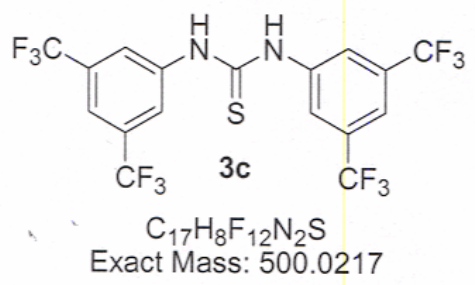

| Solvent A<br>Solvent B | Water<br>Acetonitrile |     |
|------------------------|-----------------------|-----|
| Time                   | % A                   | % B |
| 0                      | 95                    | 5   |
| 15                     | 5                     | 95  |
| 20                     | 5                     | 95  |

DAD: TIC Smooth (Mn, 2x1)

6.1e+007

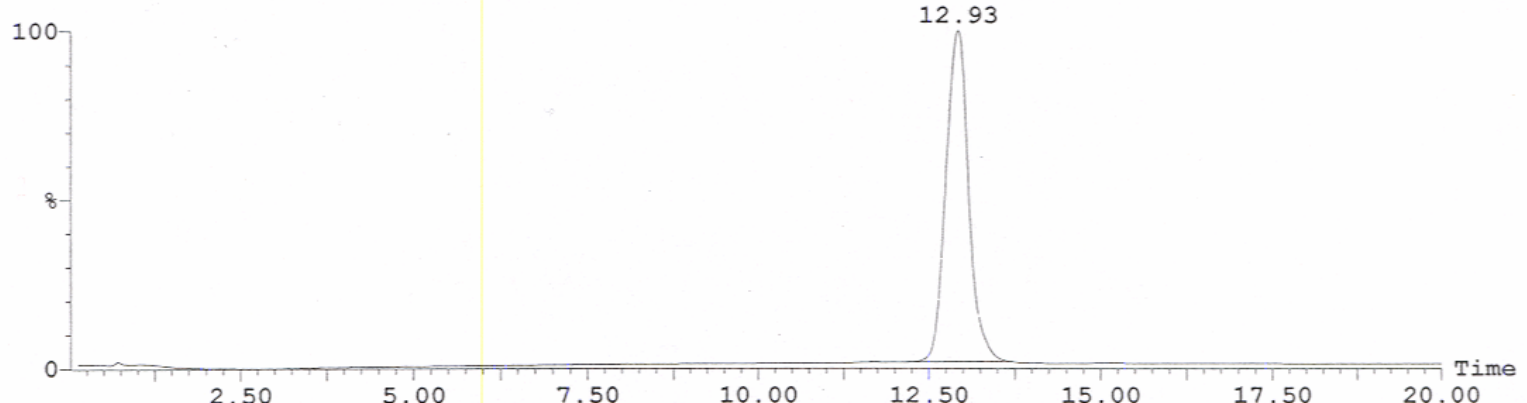

| Peak Number | Compound | Time  | AreaAbs | Area %Total | Width | Height | Mass Found |
|-------------|----------|-------|---------|-------------|-------|--------|------------|
| 3           |          | 12.93 | 2e+007  | 100.00      | 2     | 6e+007 |            |

Peak ID Compound Time Mass Found  
 3 12.95

Combine (484:488-(473:474+498:499))

2:MS AP+  
 2.9e+006

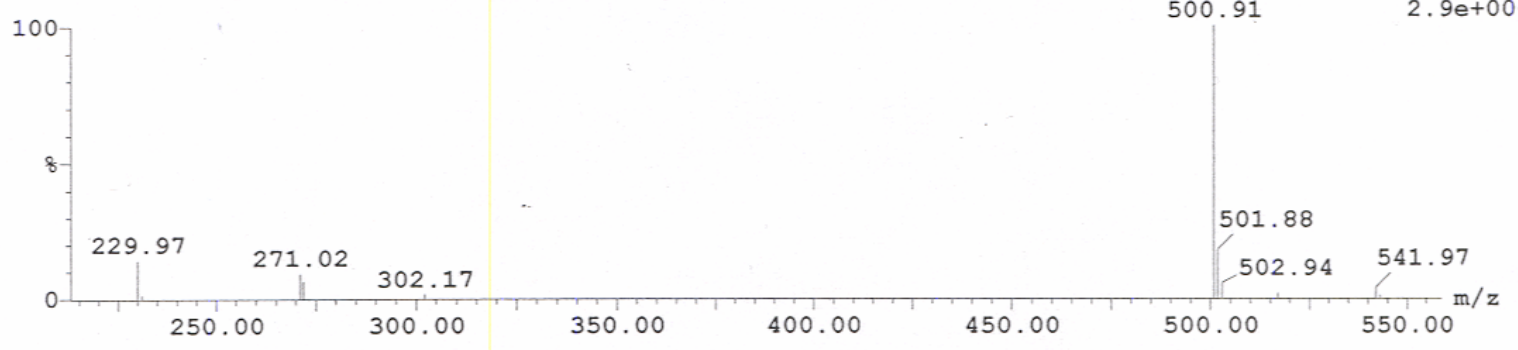

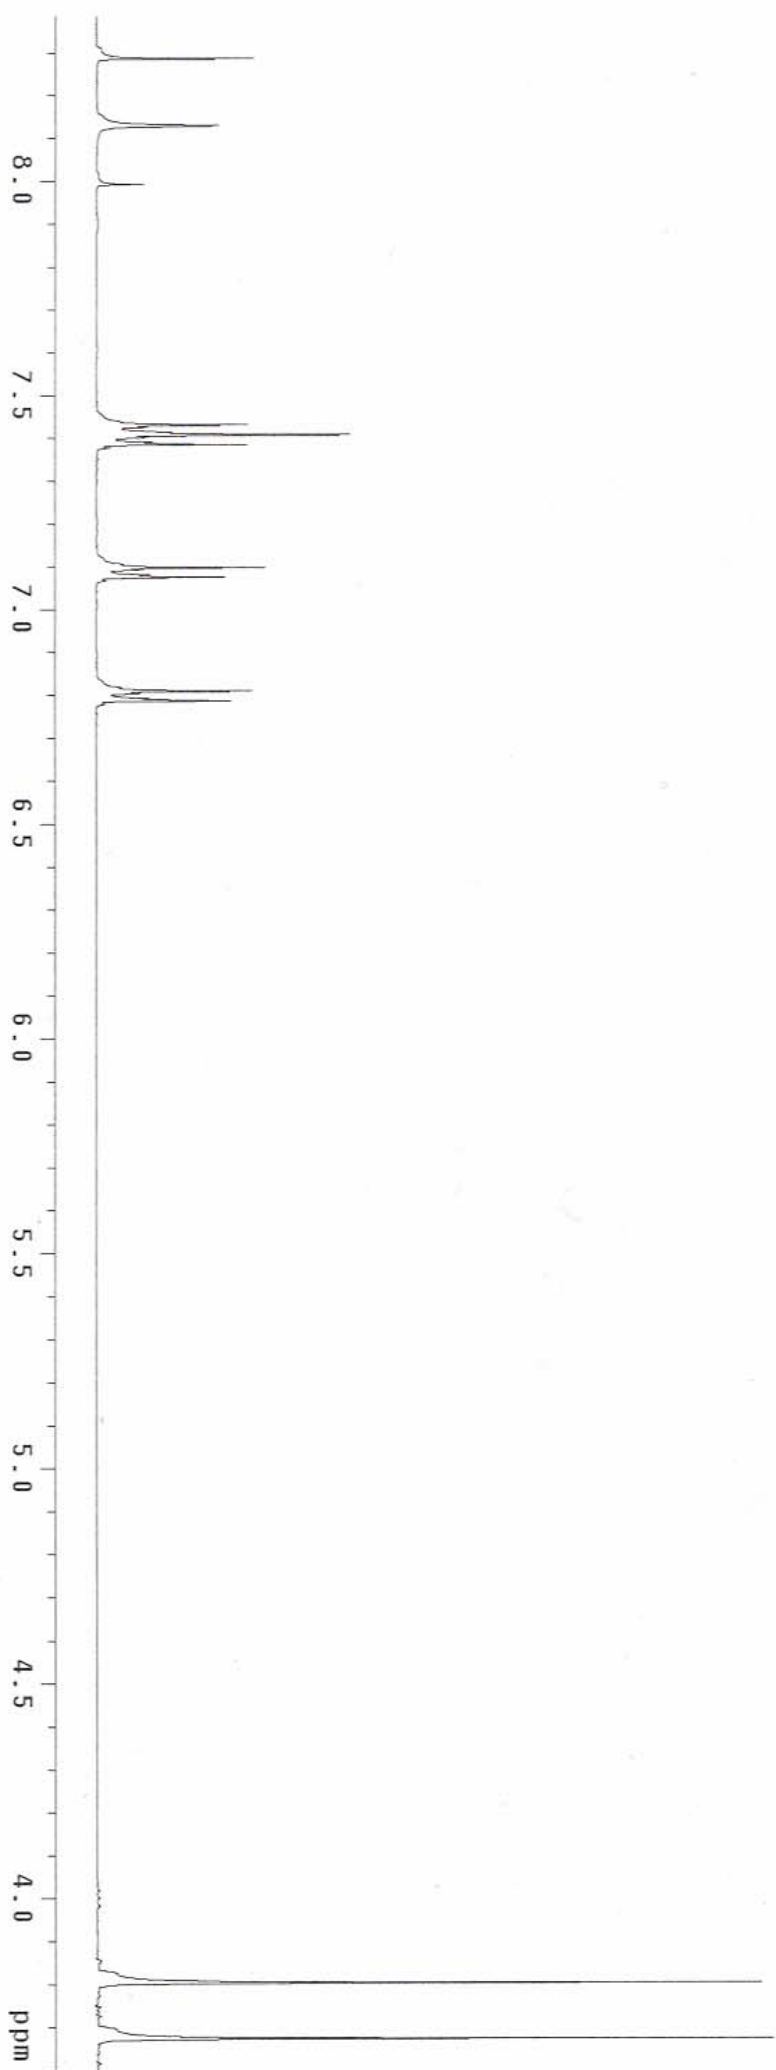

<sup>1</sup>H NMR, DMSO-d<sub>6</sub>, 400MHz

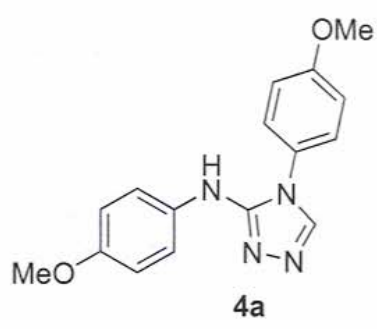

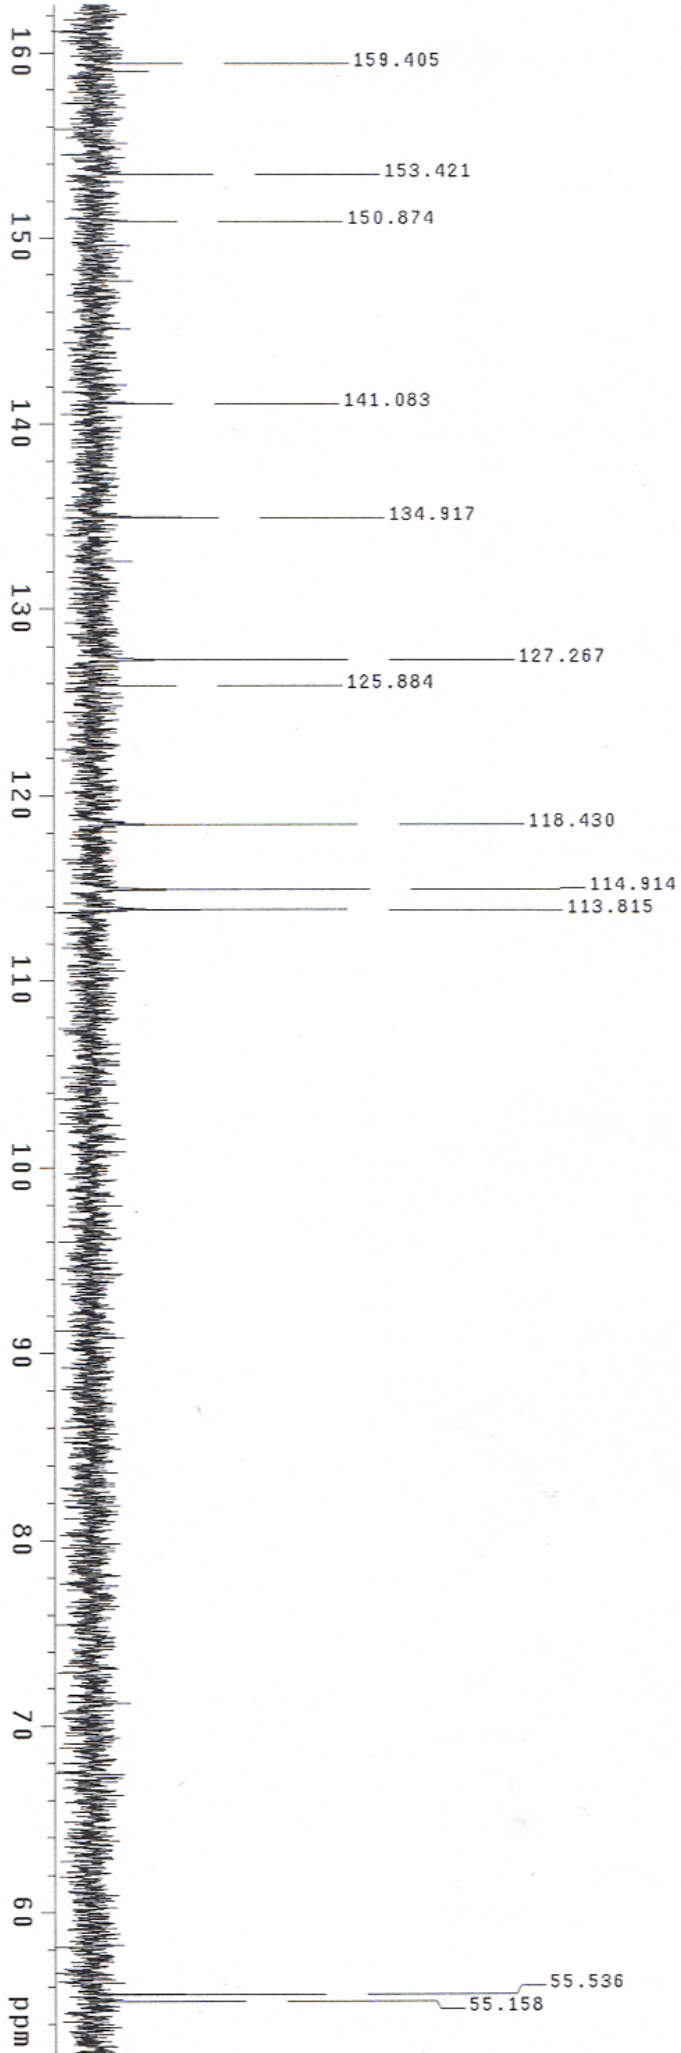

<sup>13</sup>CNMR, DMSO-d<sub>6</sub>, 100MHz

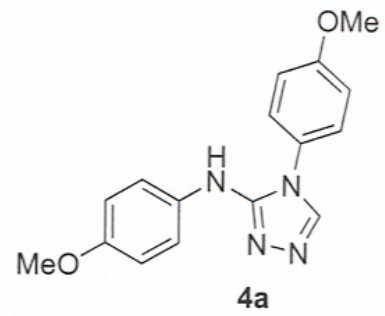

<sup>1</sup>HNMR, DMSO-d<sub>6</sub>, 500MHz

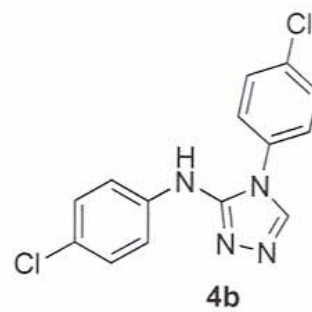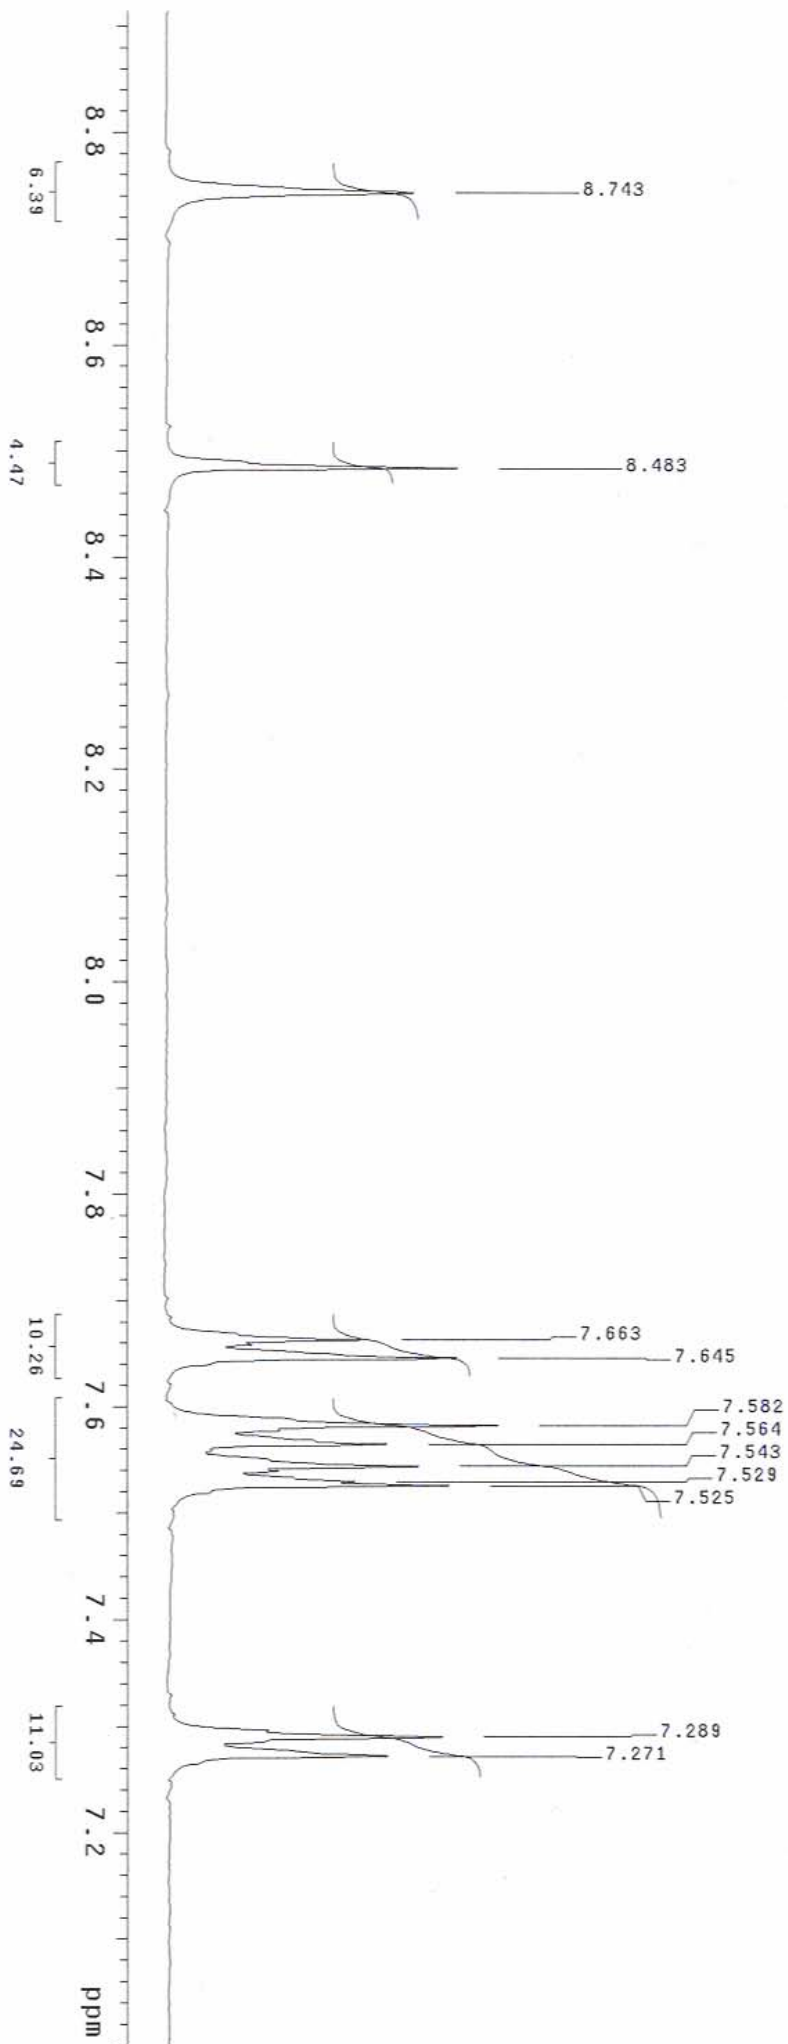



$^{13}\text{C}$ NMR, DMSO-d<sub>6</sub>, 125MHz

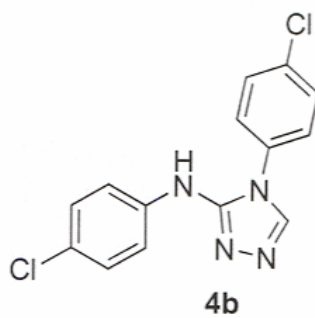

180  
160  
140  
120  
100  
80  
60  
40  
20  
ppm

Pulse Sequence: szpu1

Solvent: DMSO

Temp: 20.0 C / 293.1 K

Mercury-400BB "mercury400"

Relax. delay 0.120 sec

Pulse 62.5 degrees

Acq. time 2.733 sec

Width 5995.2 Hz

16 repetitions

OBSERVE H1, 400.0248424 MHz

DATA PROCESSING

Line broadening 0.1 Hz

FT size 32768

Total time 1 min, 4 sec

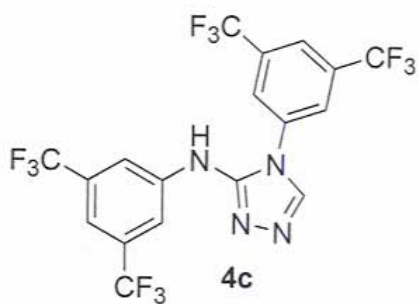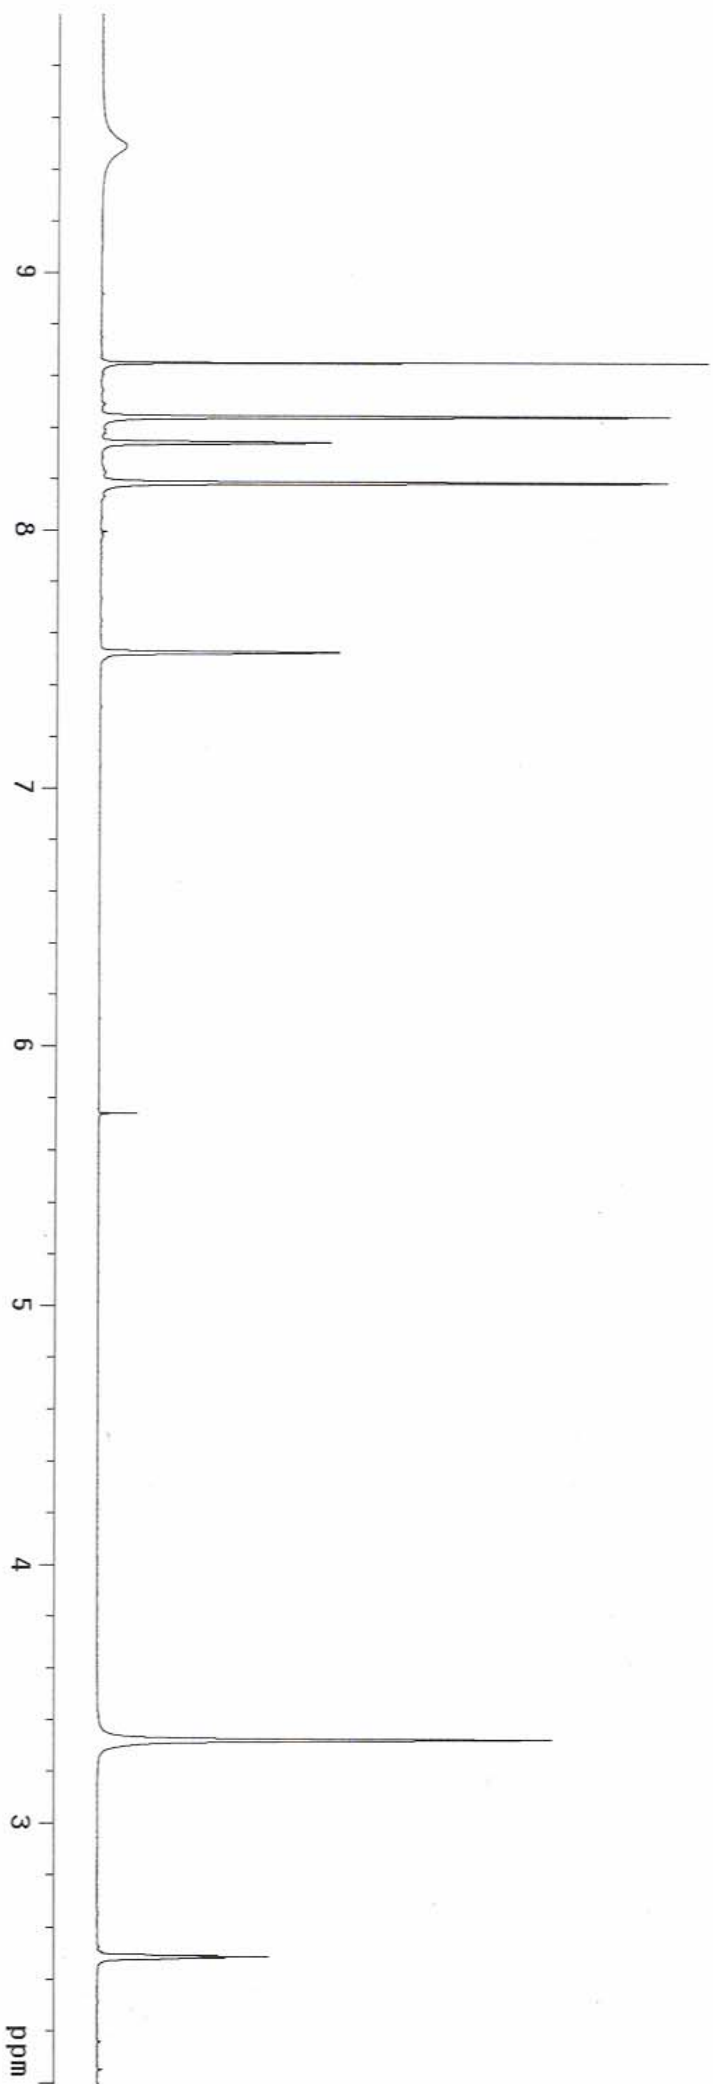

LC – Xterra C18 5 $\mu$ M 3.0  $\times$  100.0 mm column  
 APCI positive MS

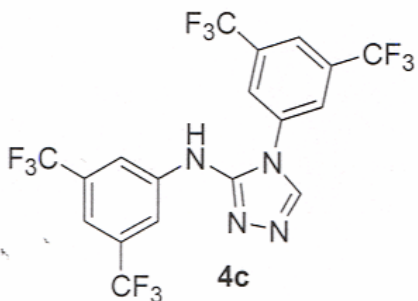

$C_{18}H_8F_{12}N_4$   
 Exact Mass: 508.0557

Solvent A  
 Solvent B

Water  
 Acetonitrile

| Time | % A | % B |
|------|-----|-----|
| 0    | 95  | 5   |
| 15   | 5   | 95  |
| 20   | 5   | 95  |

DAD: TIC Smooth (Mn, 2x1)

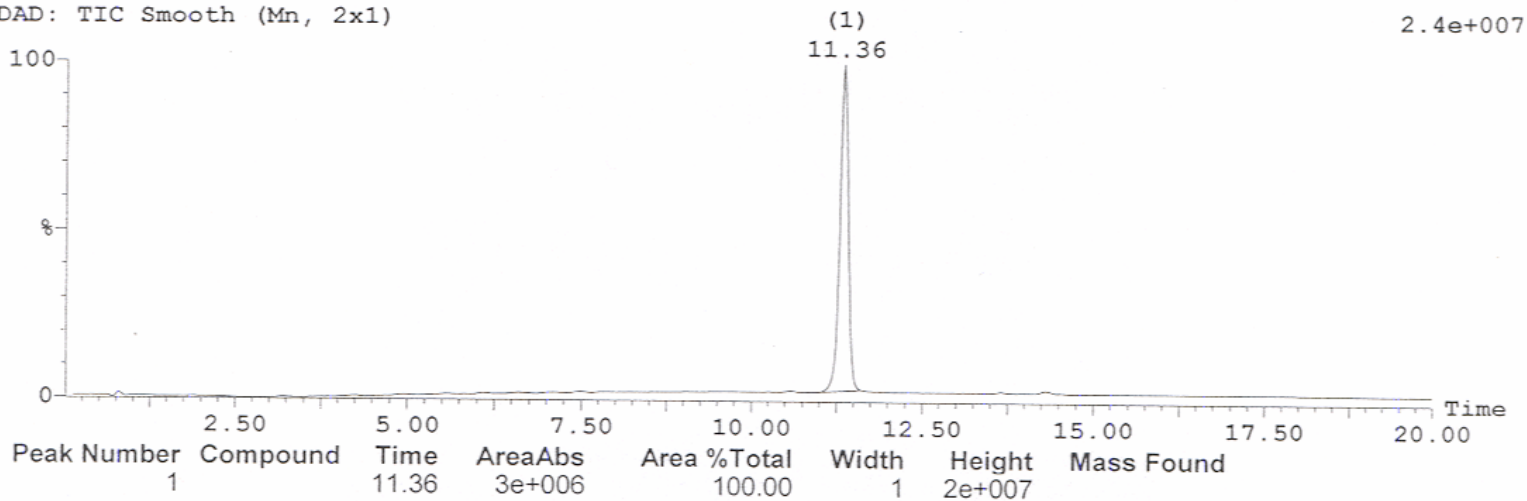

Peak ID Compound Time Mass Found

1 11.35

Combine (424:428-(413:414+438:439))

2:MS AP+  
 4.0e+007

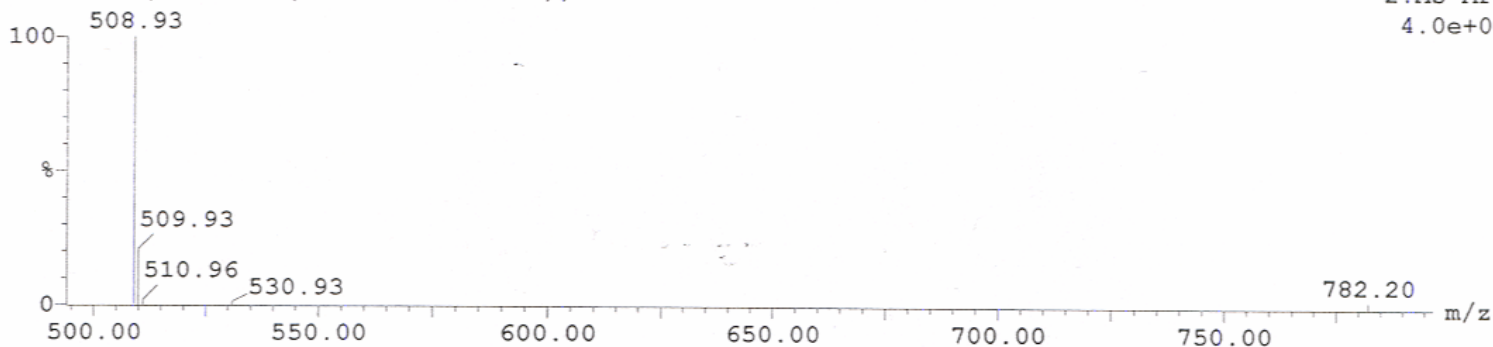

<sup>1</sup>HNMR, DMSO-d<sub>6</sub>, 500MHz

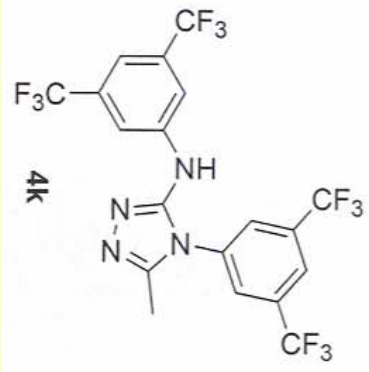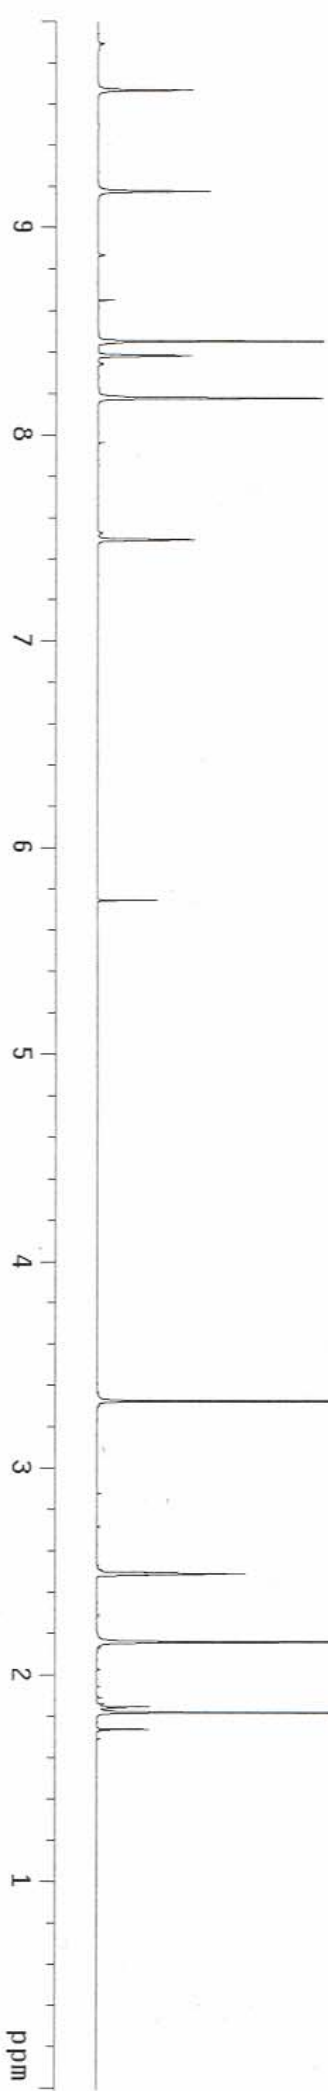

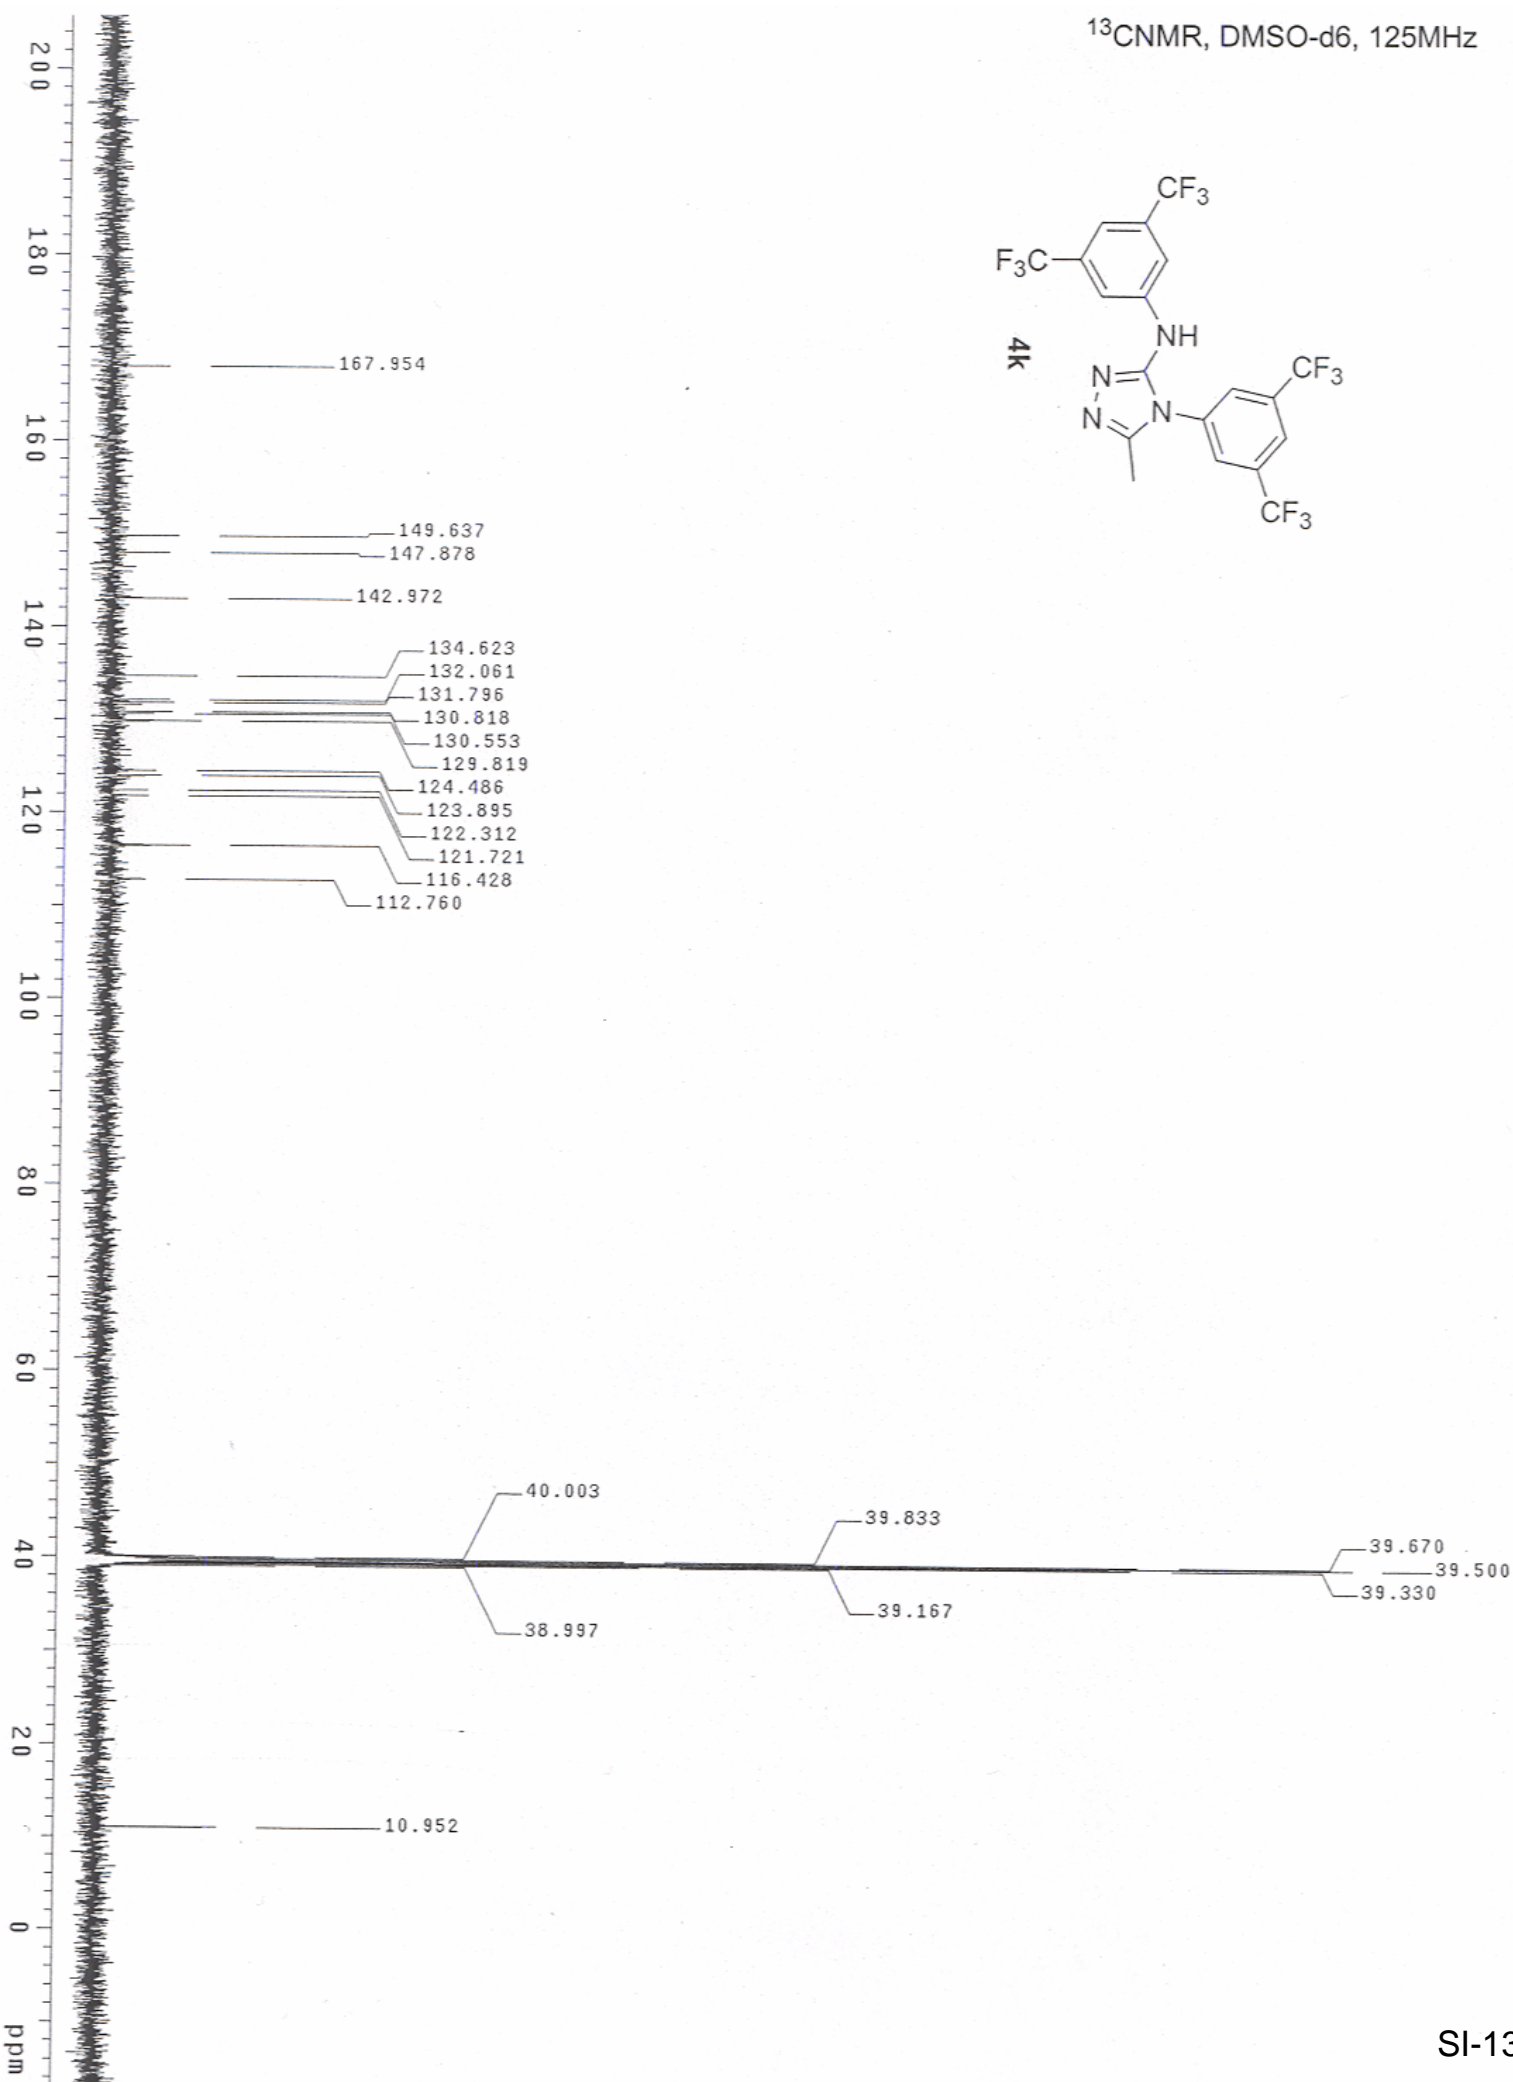

<sup>1</sup>HNMR, DMSO-d<sub>6</sub>, 500MHz

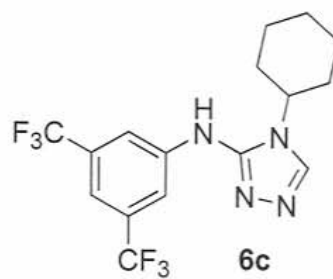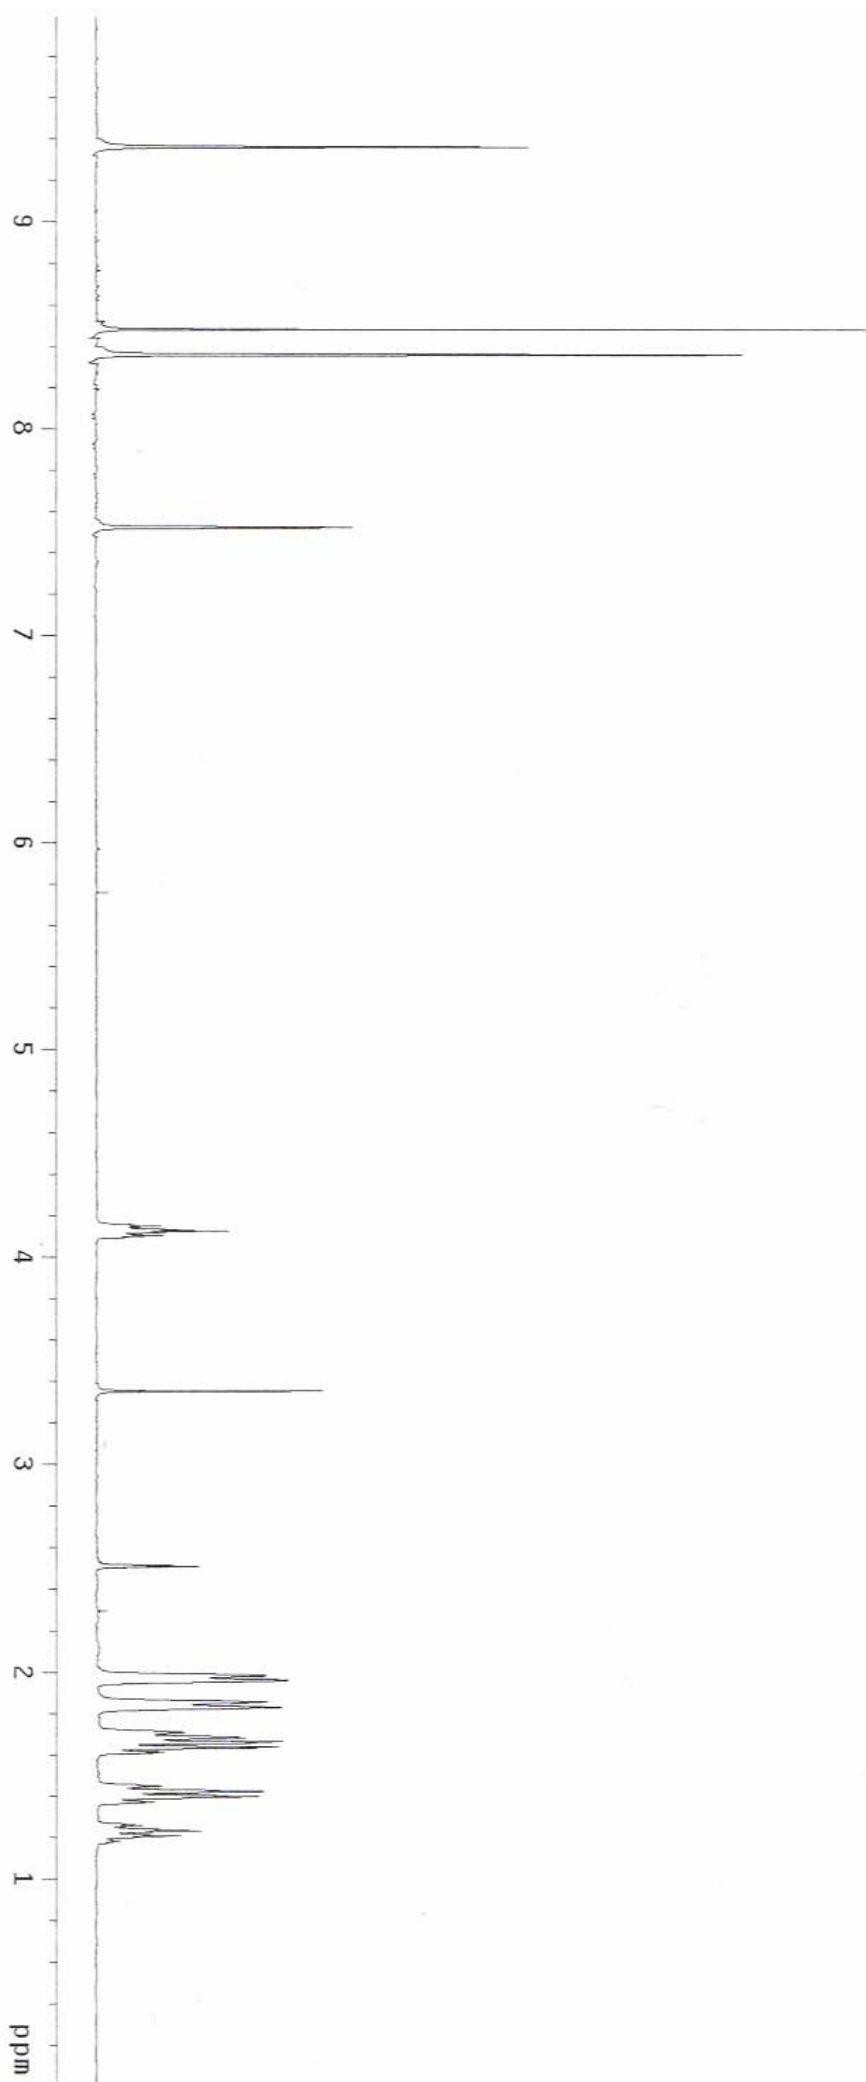

<sup>13</sup>CNMR, DMSO-d<sub>6</sub>, 125MHz

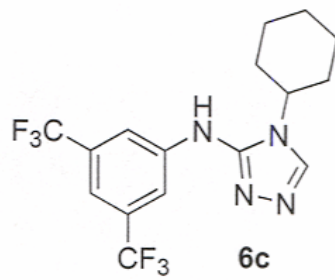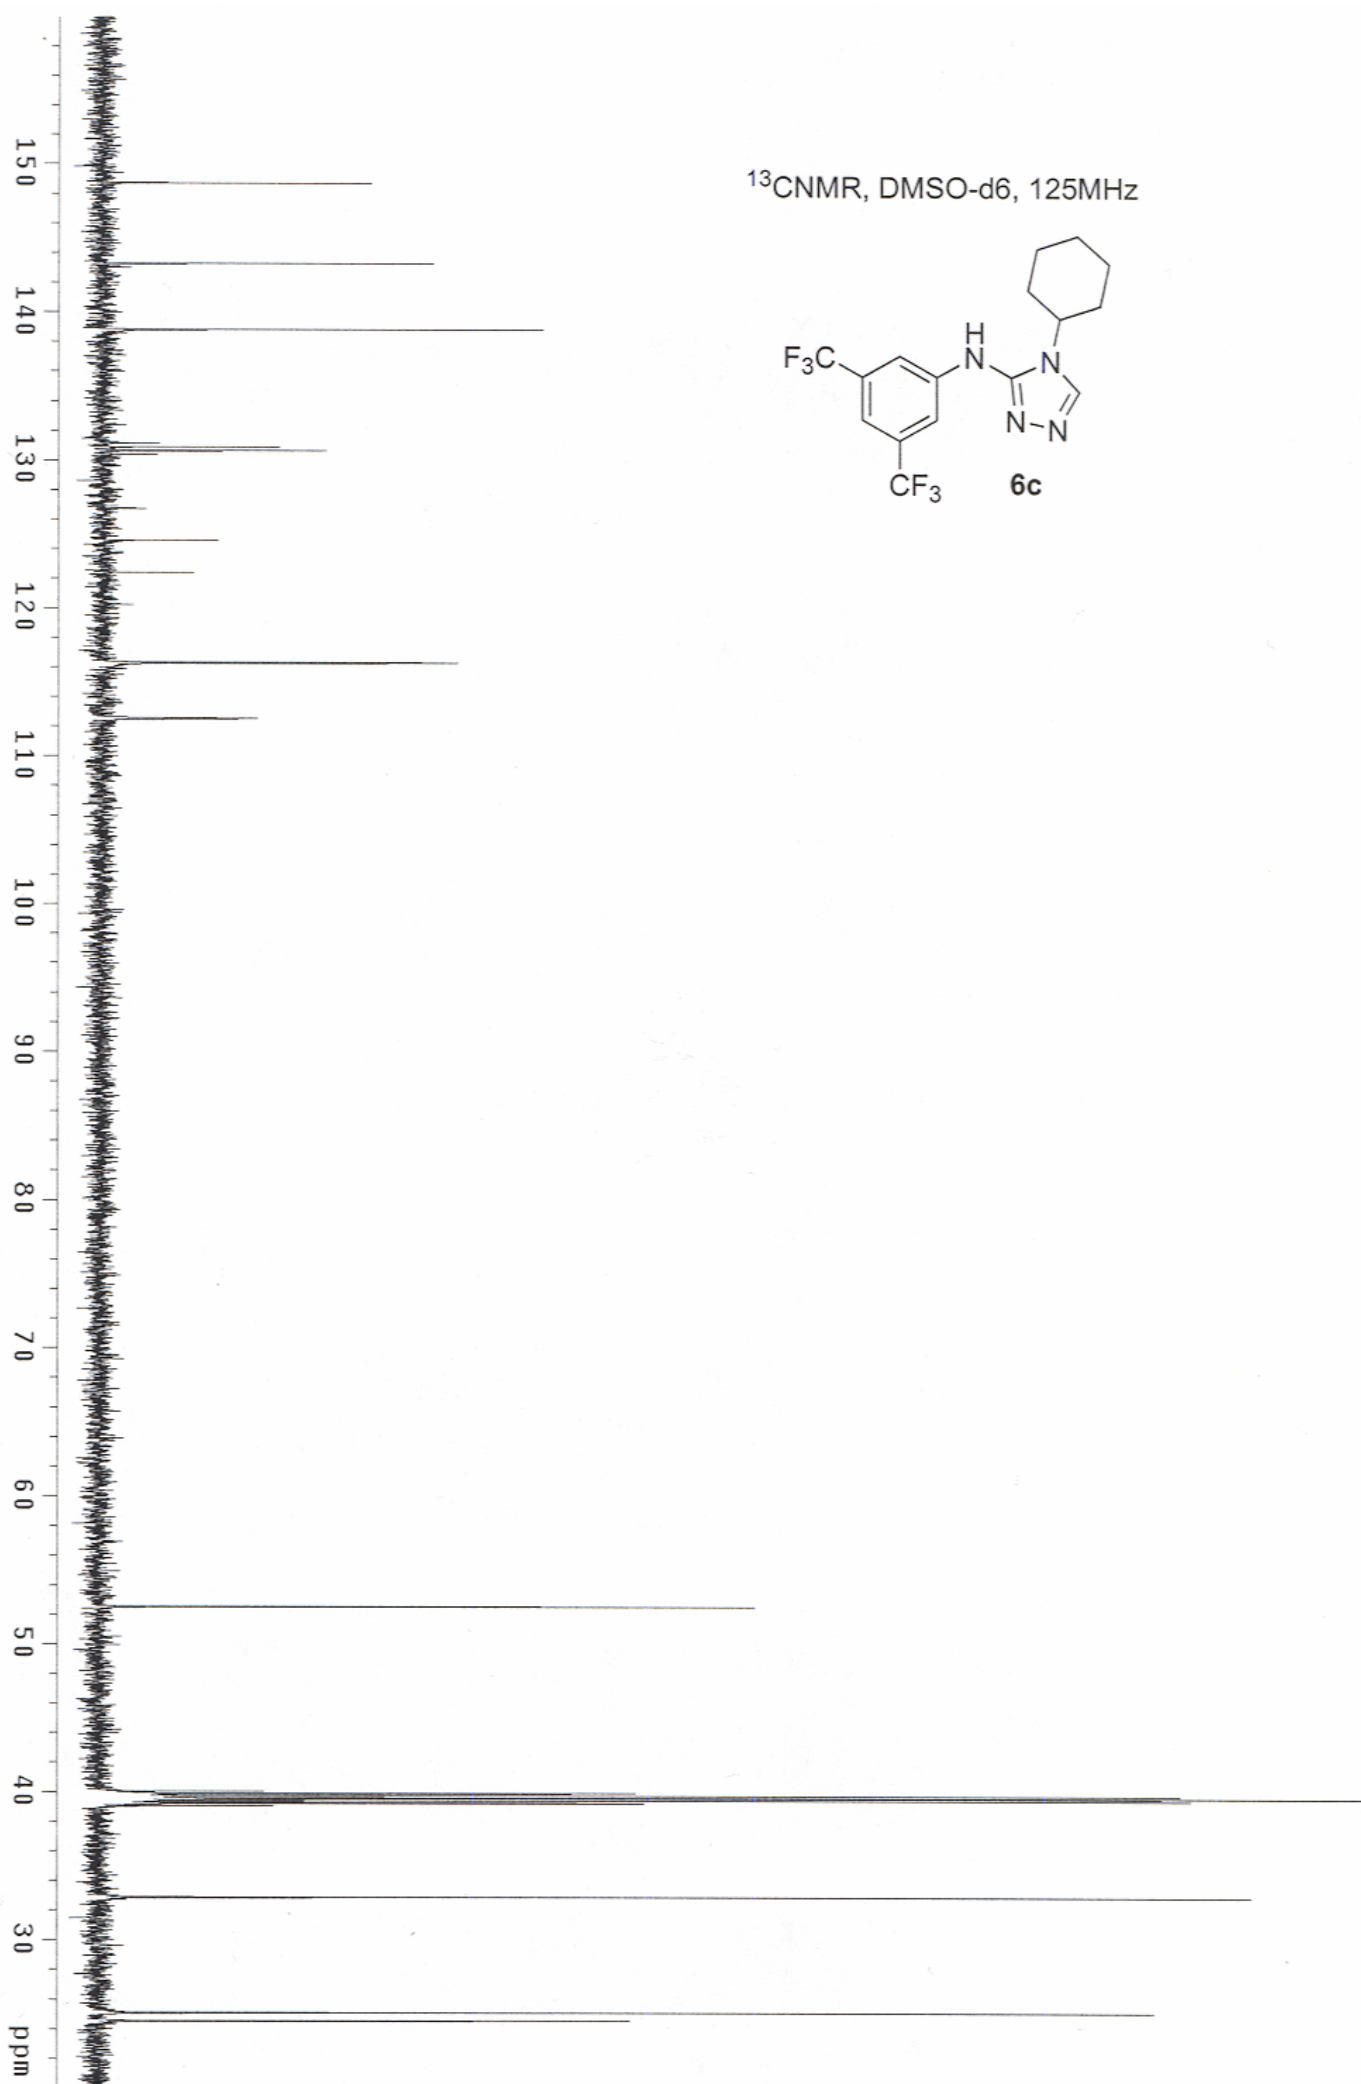

# TOCSY

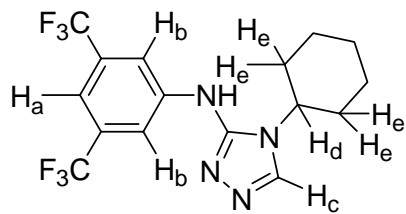

**6c**

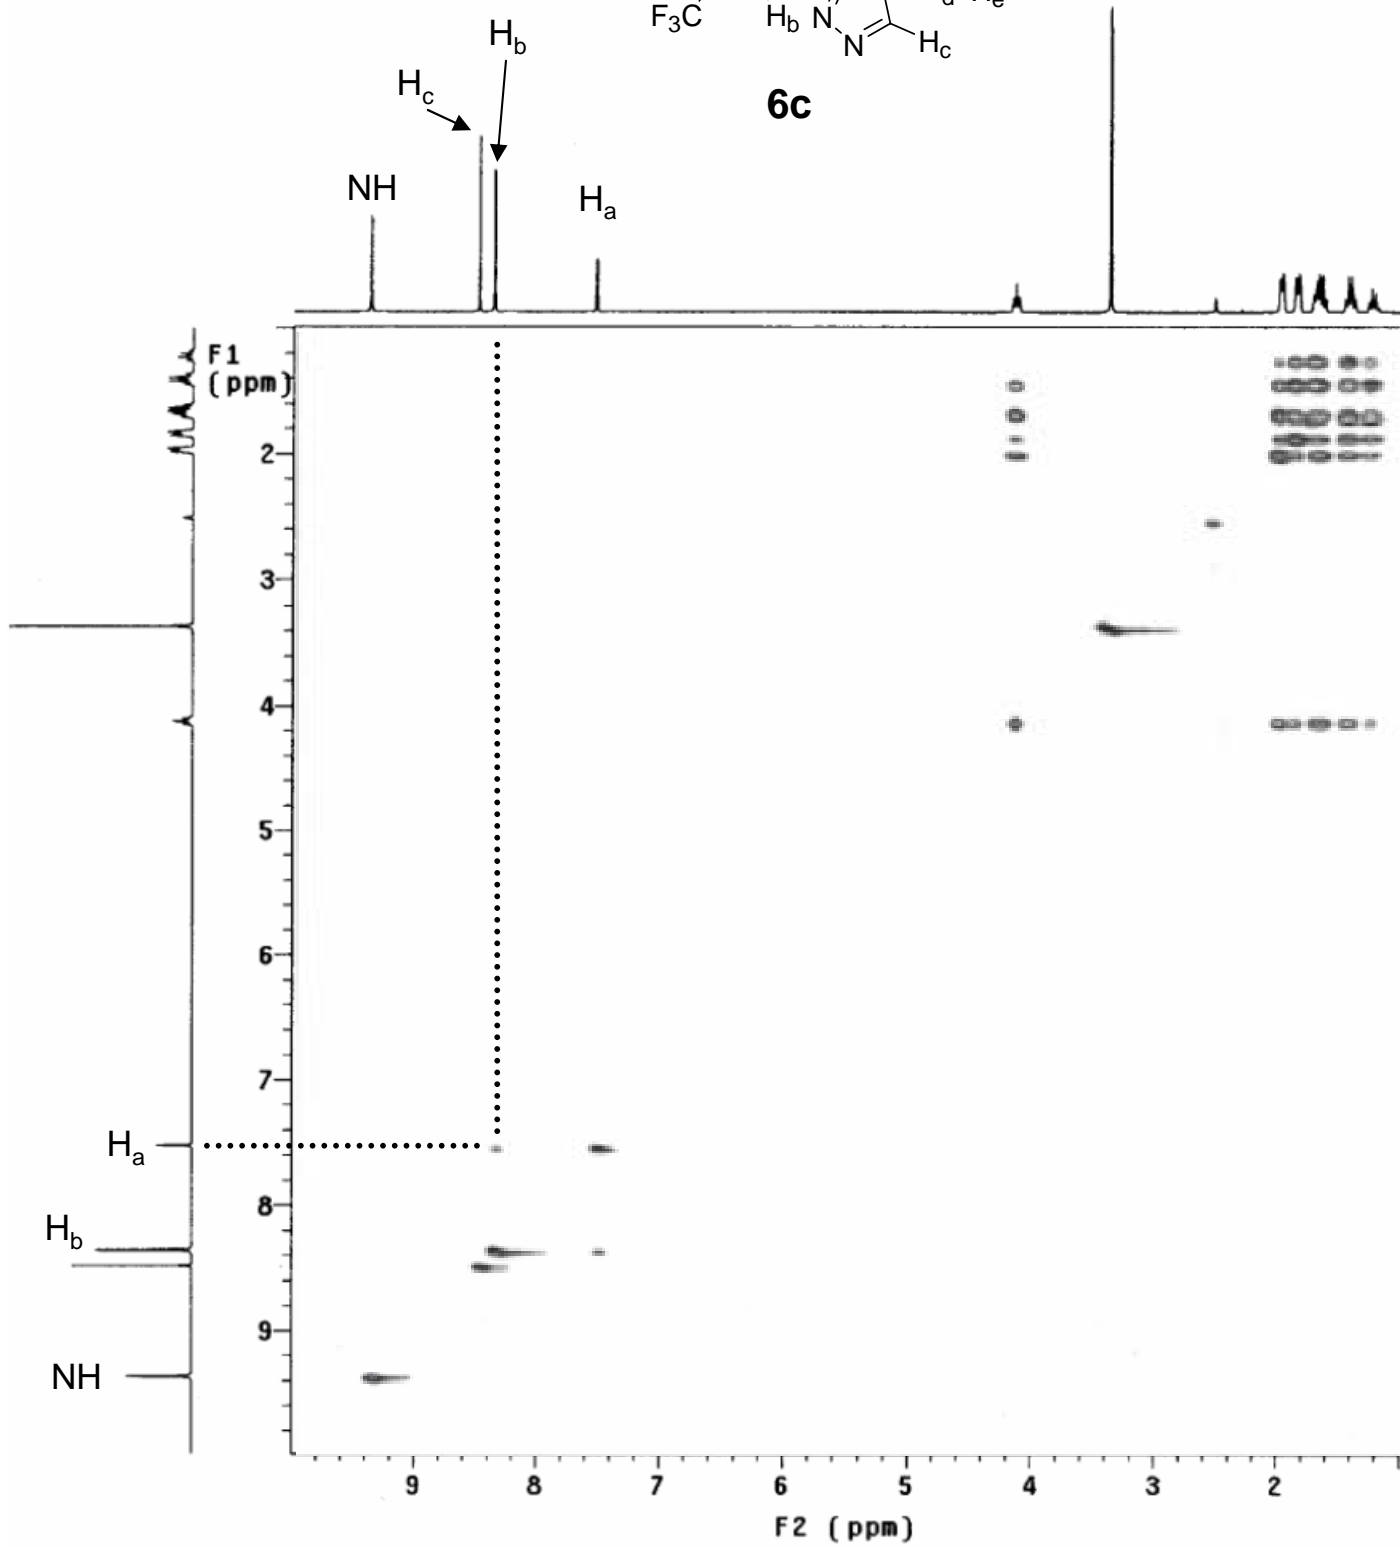



# NOESY

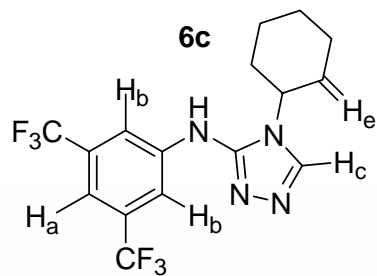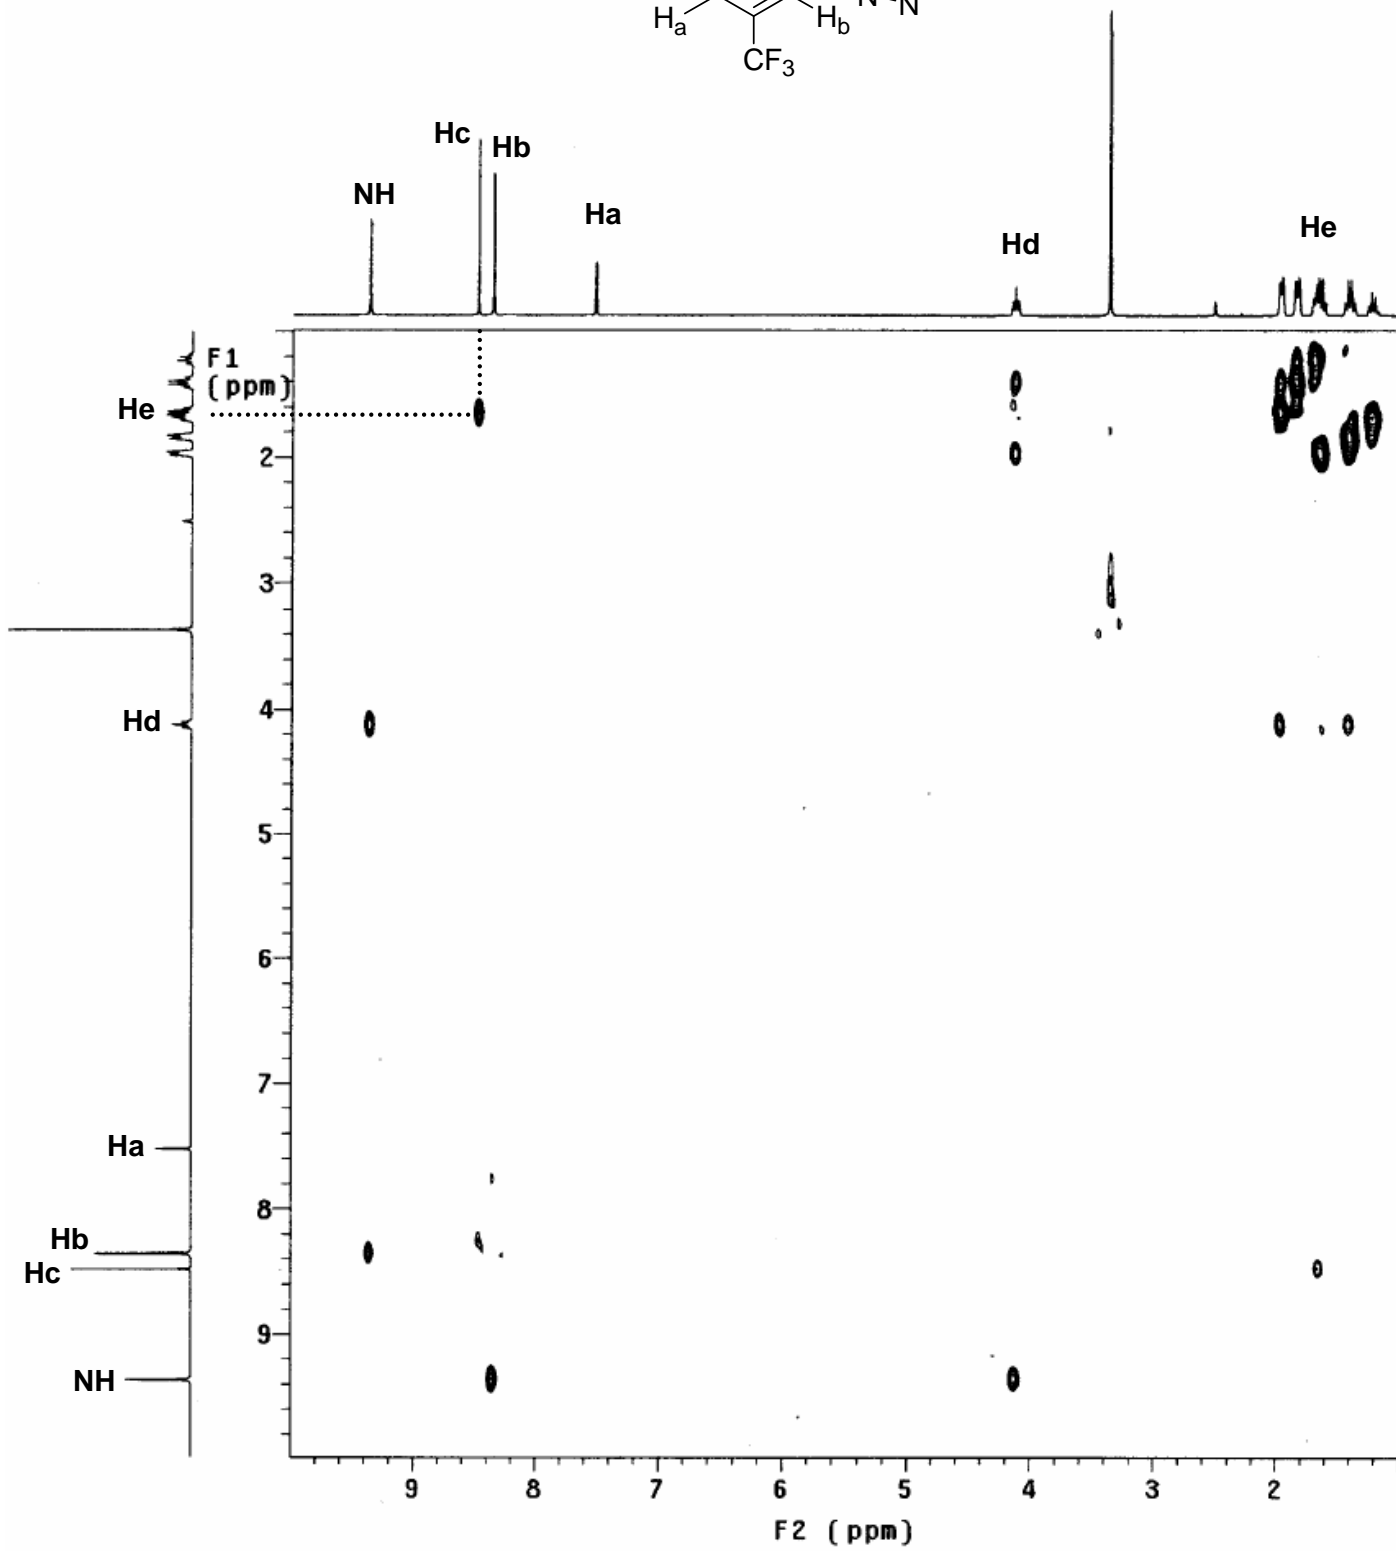

<sup>1</sup>HNMR, DMSO-d6, 400MHz

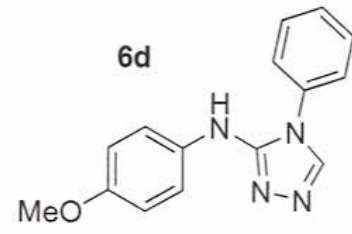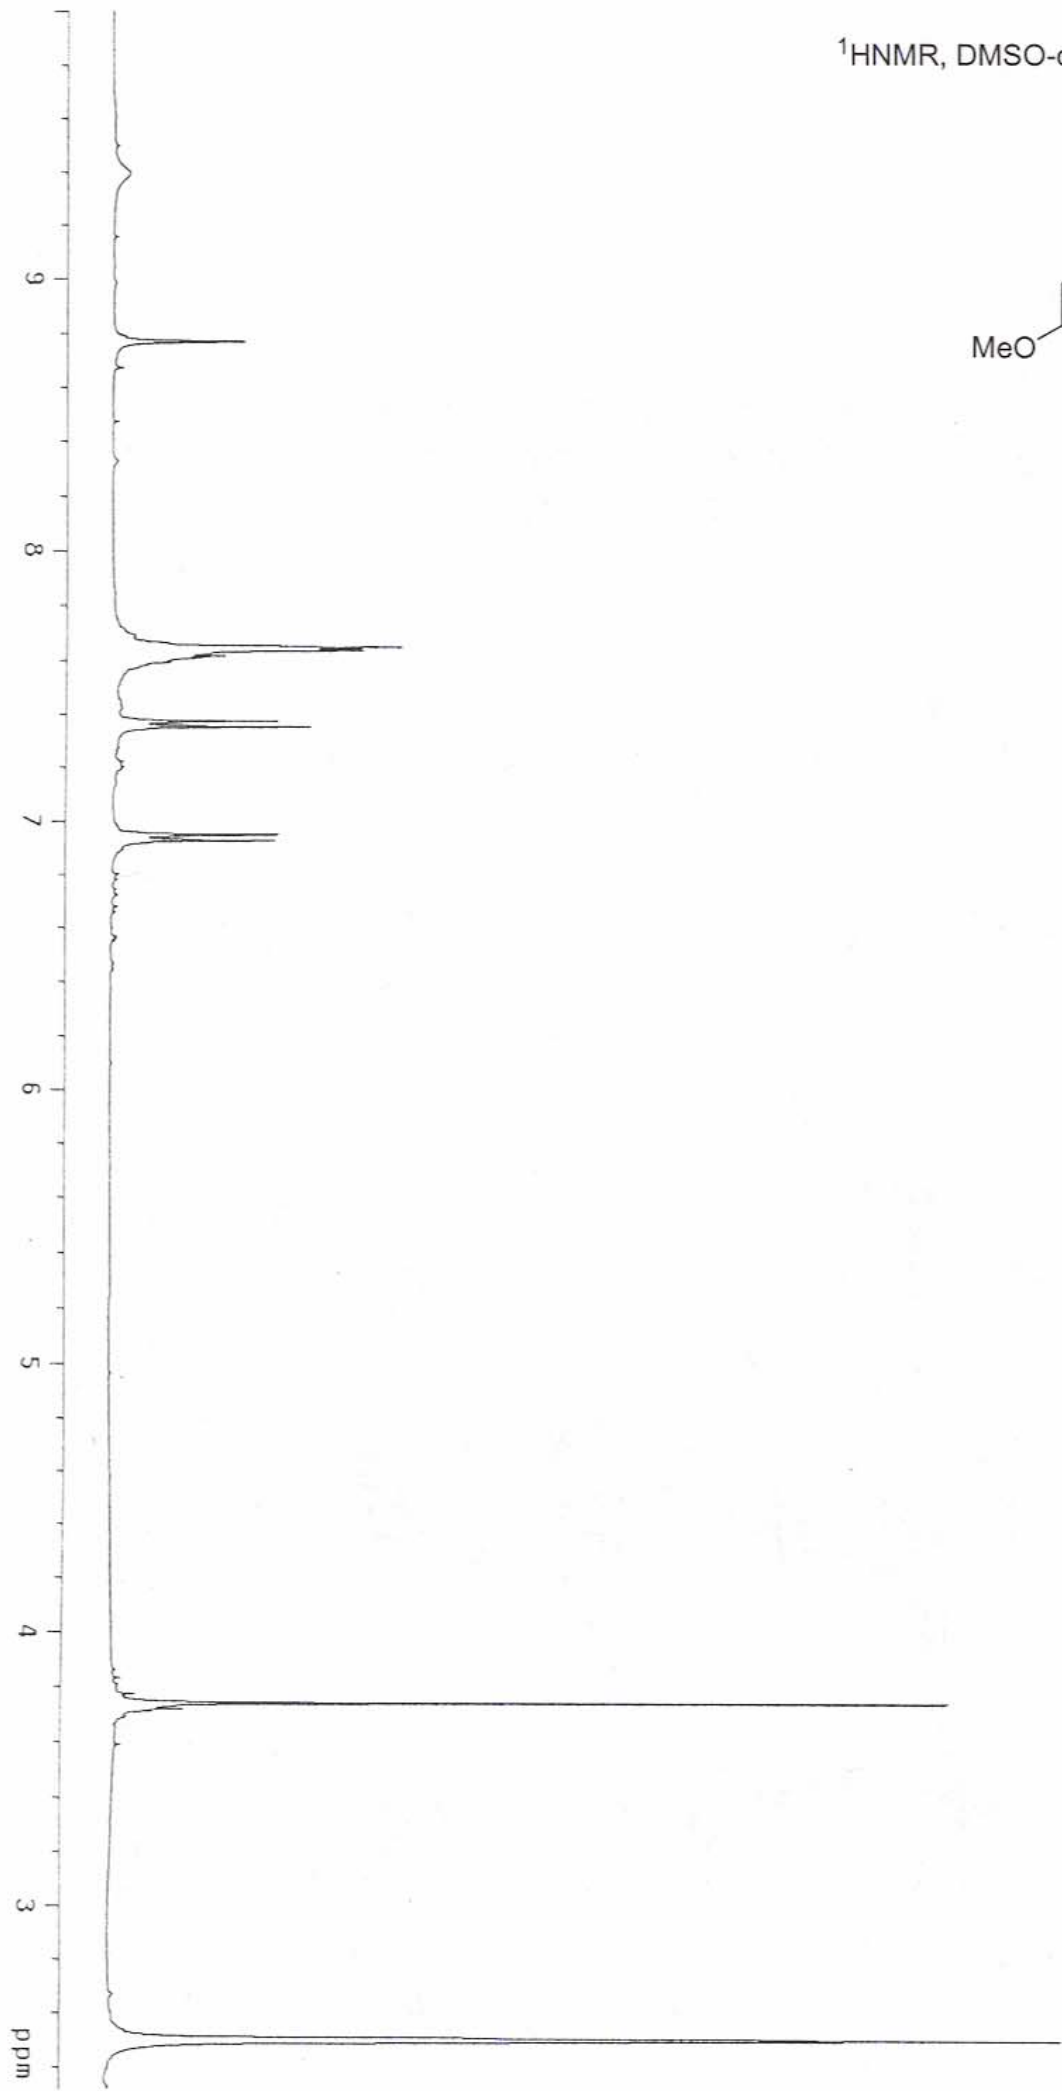

<sup>1</sup>HNMR, DMSO-d6, 500MHz

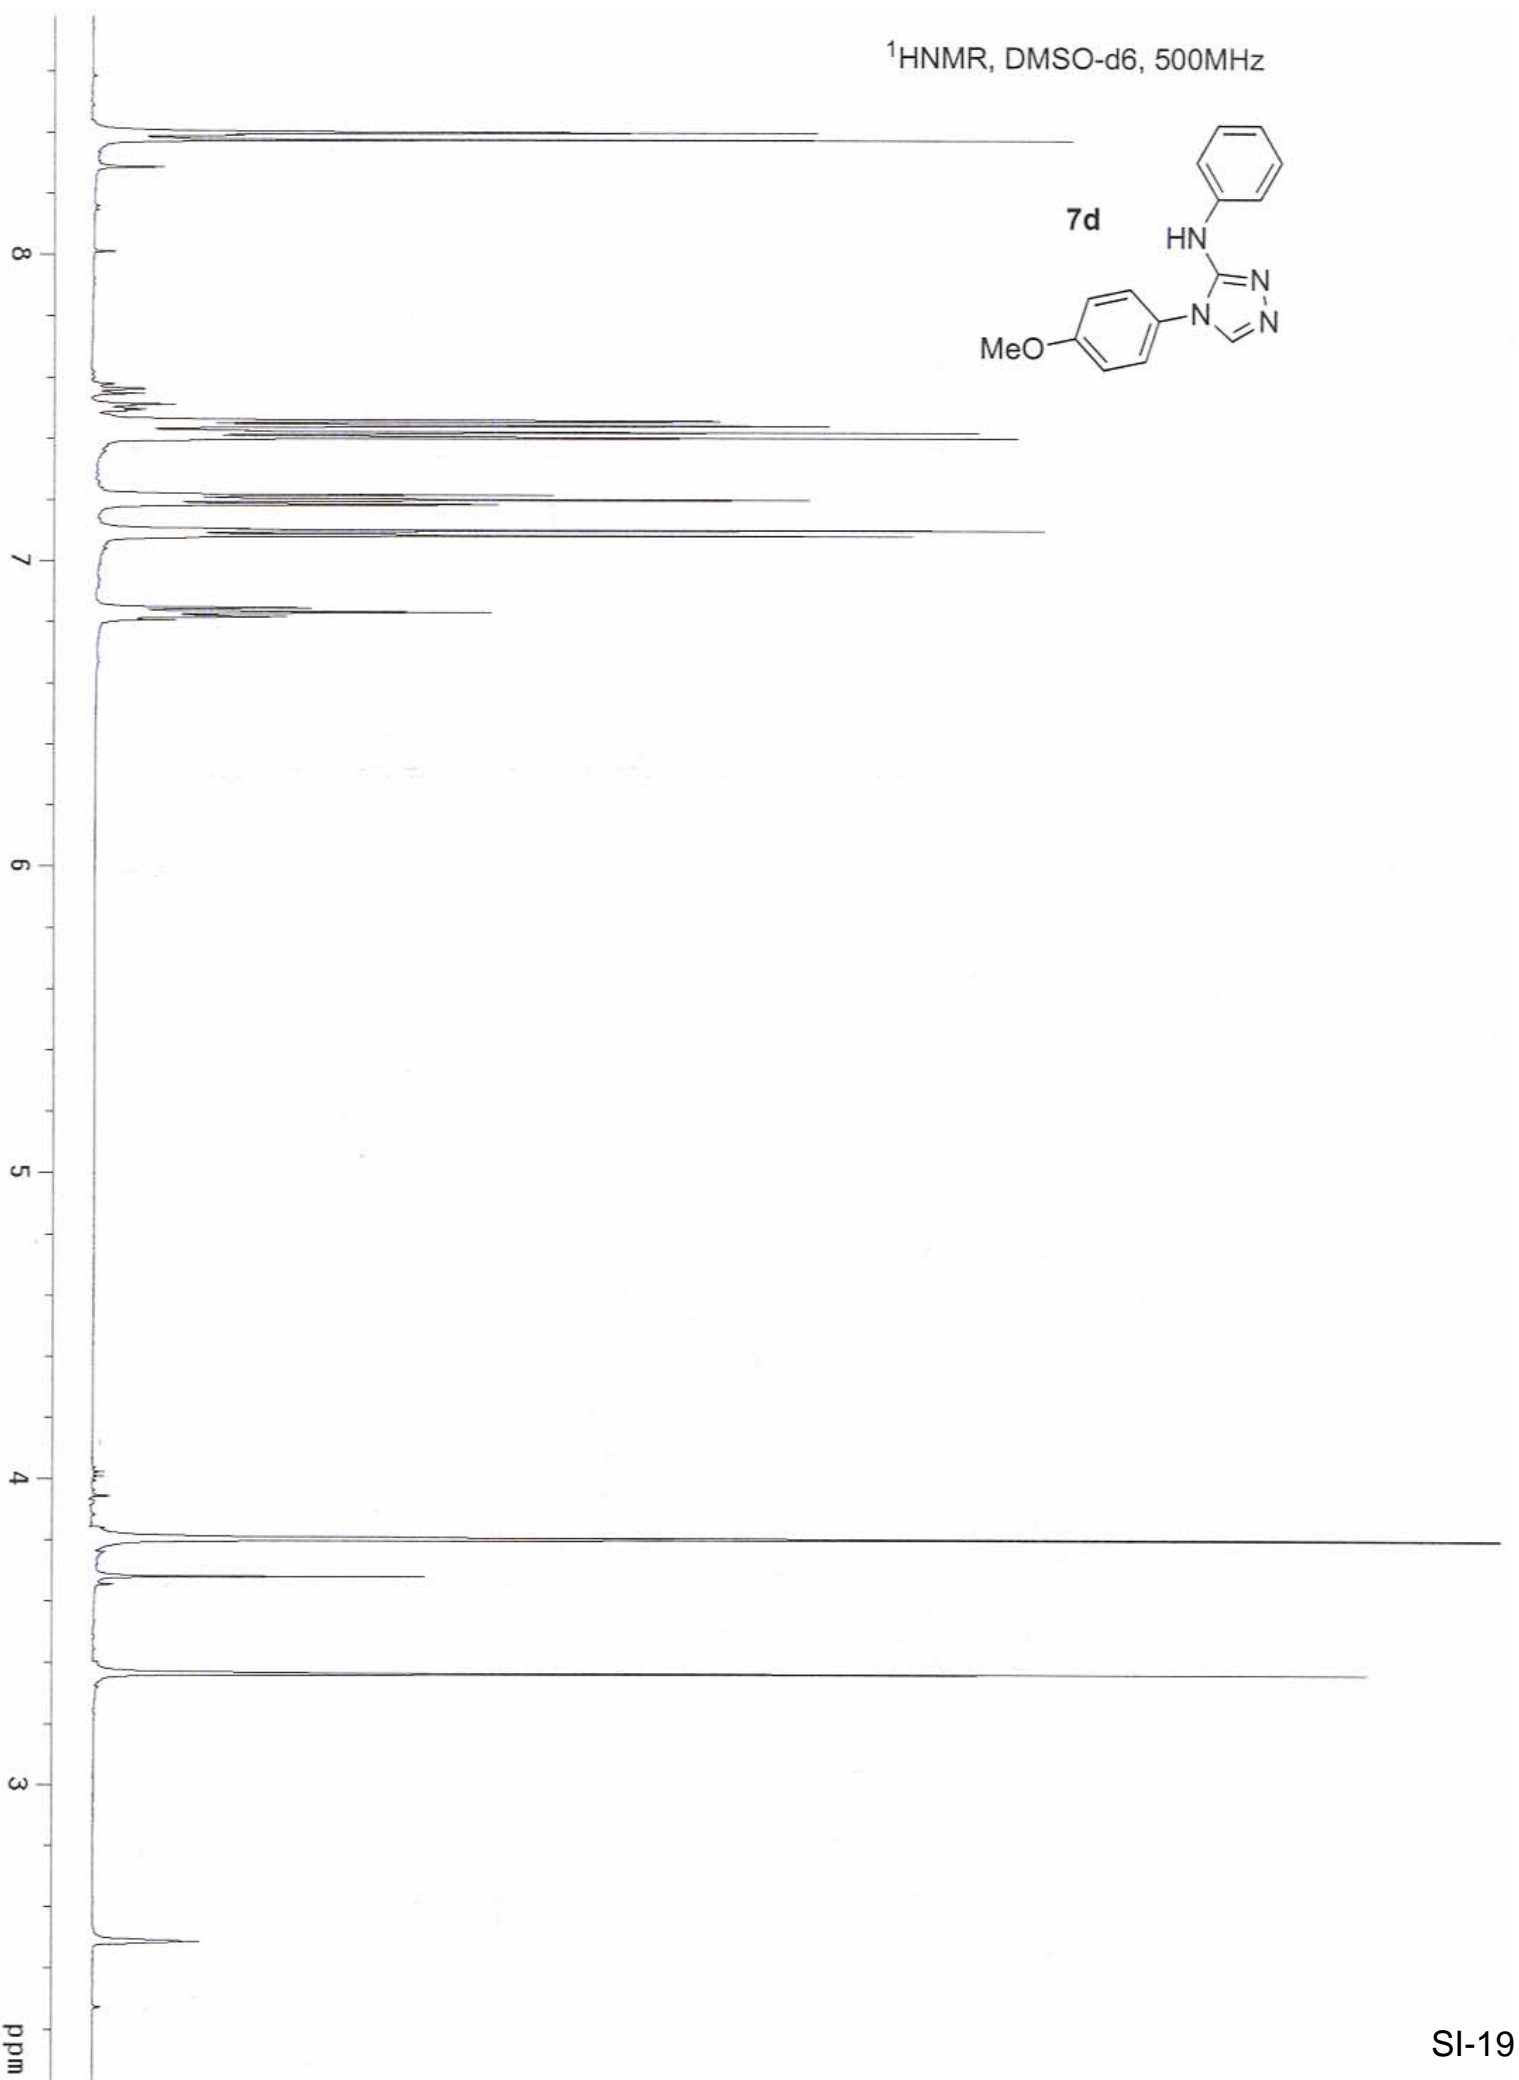

$^{13}\text{C}$ NMR, DMSO-d<sub>6</sub>, 125MHz

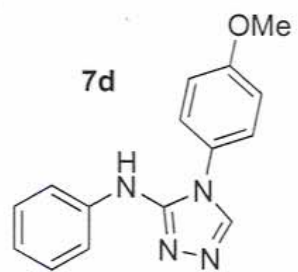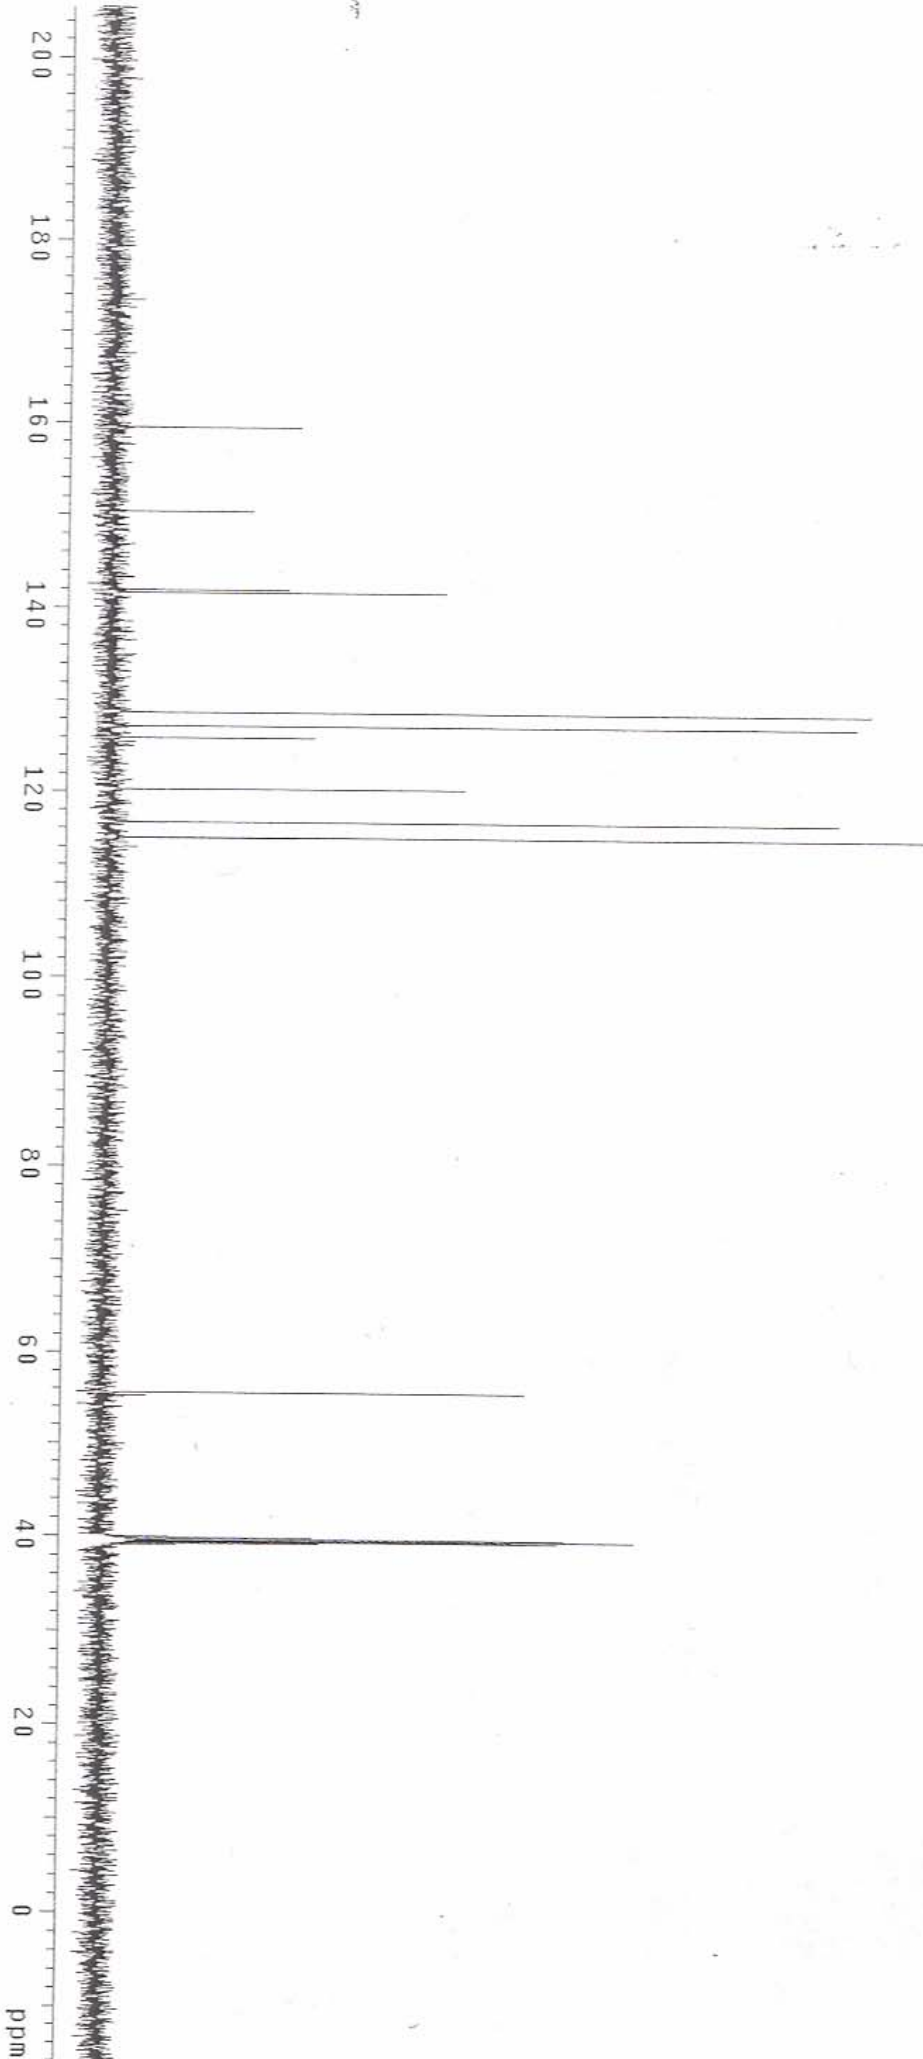

# Total ion chromatogram of the reaction mixture and pure 6d and 7d

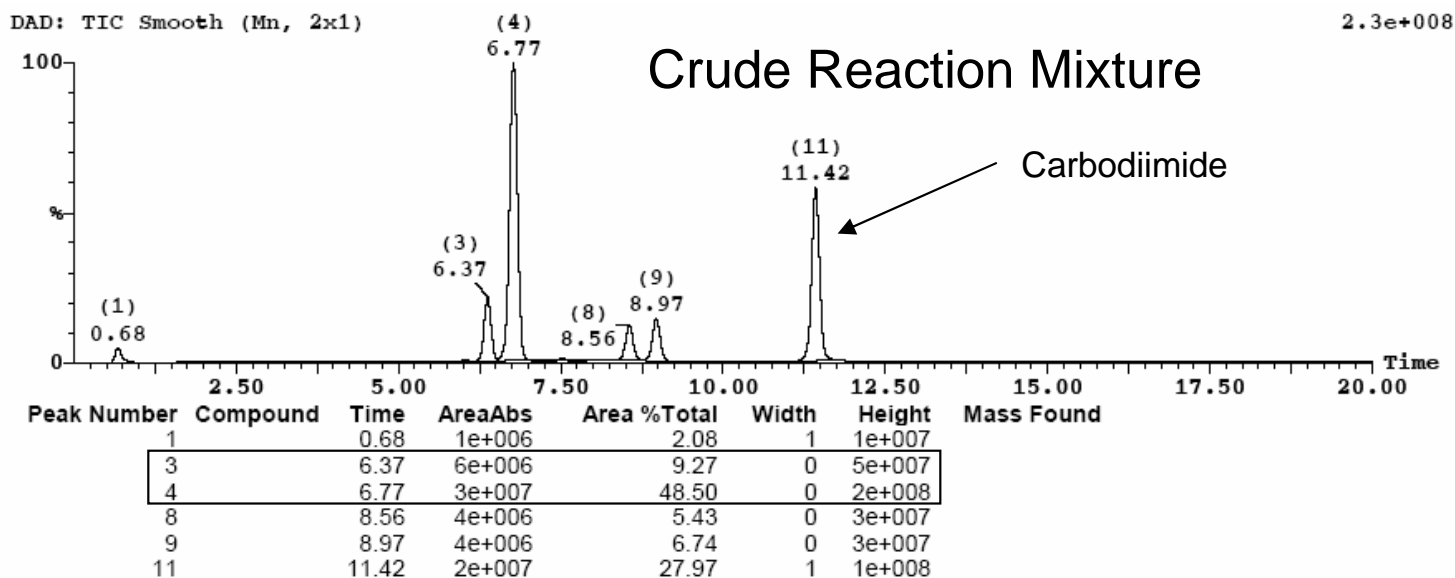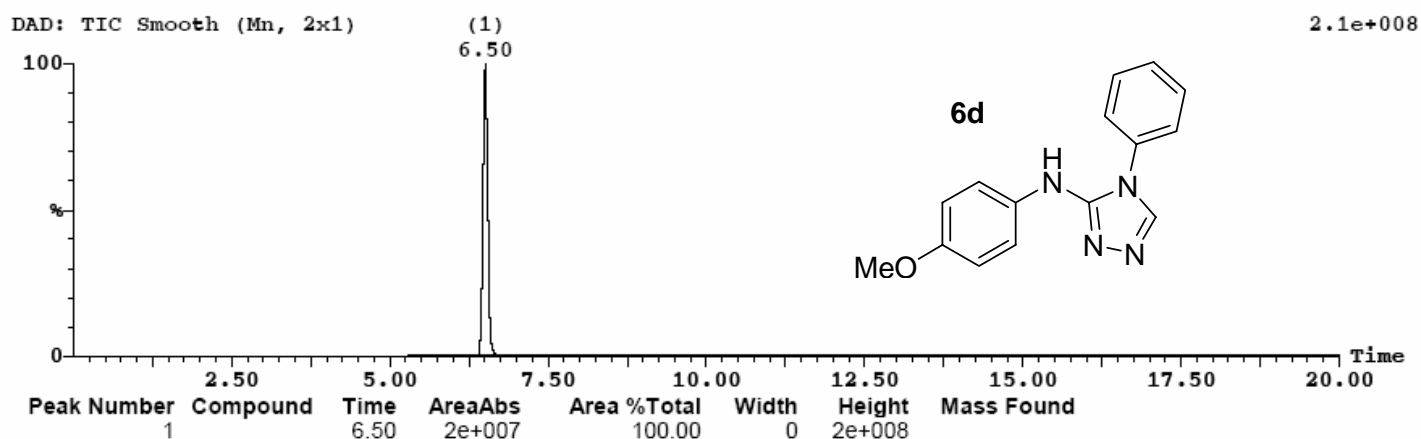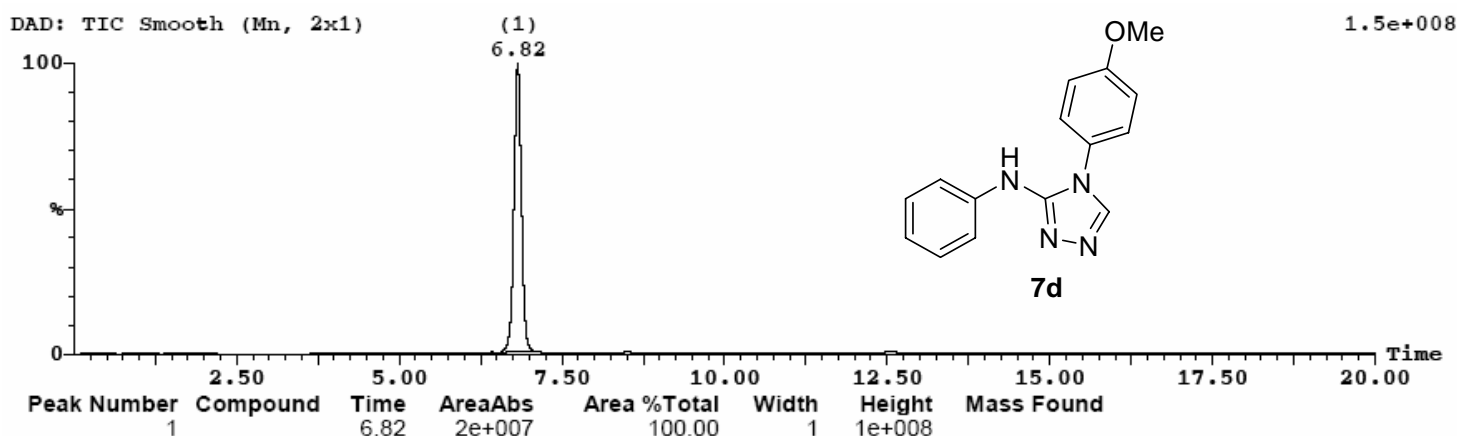

# 1HNMR of reaction mixture of 6e and 7e

CRUDE MIXTURE

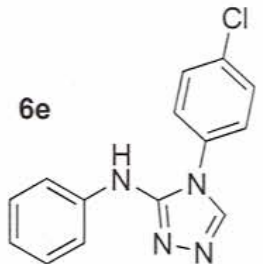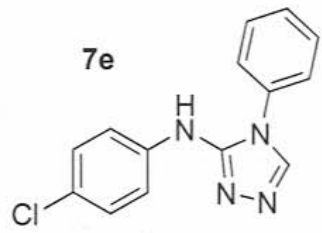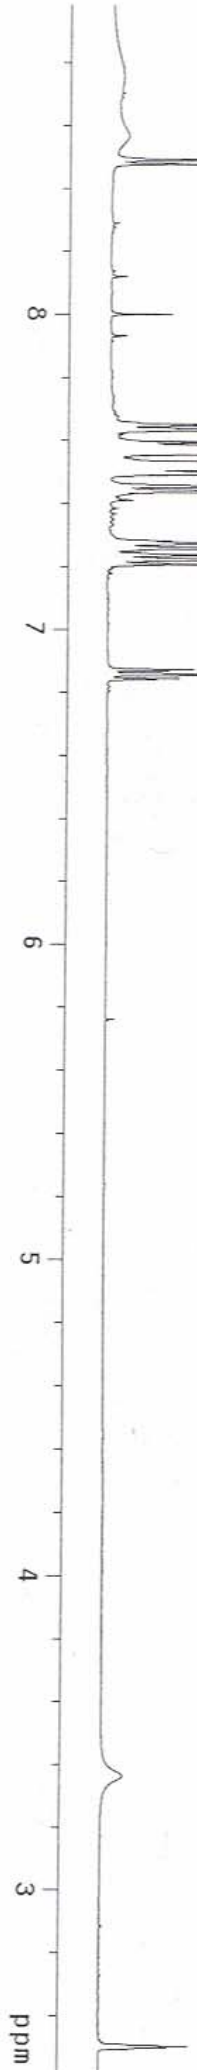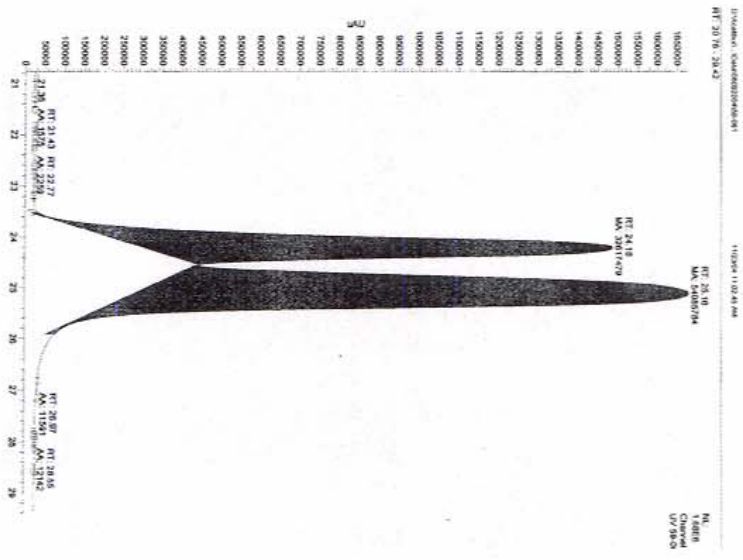

Integration  
LC trace

2:3 mixture

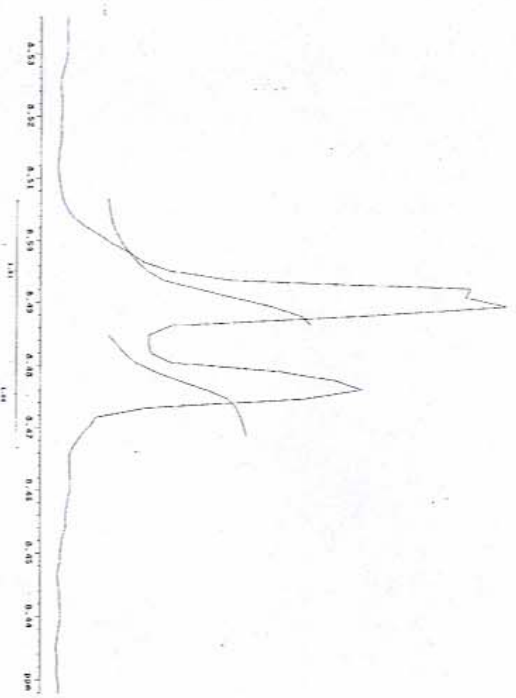

Integration  
NMR expanded

<sup>1</sup>HNMR, DMSO-d<sub>6</sub>, 400MHz

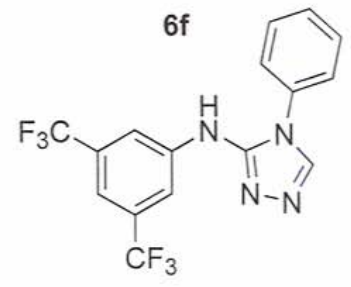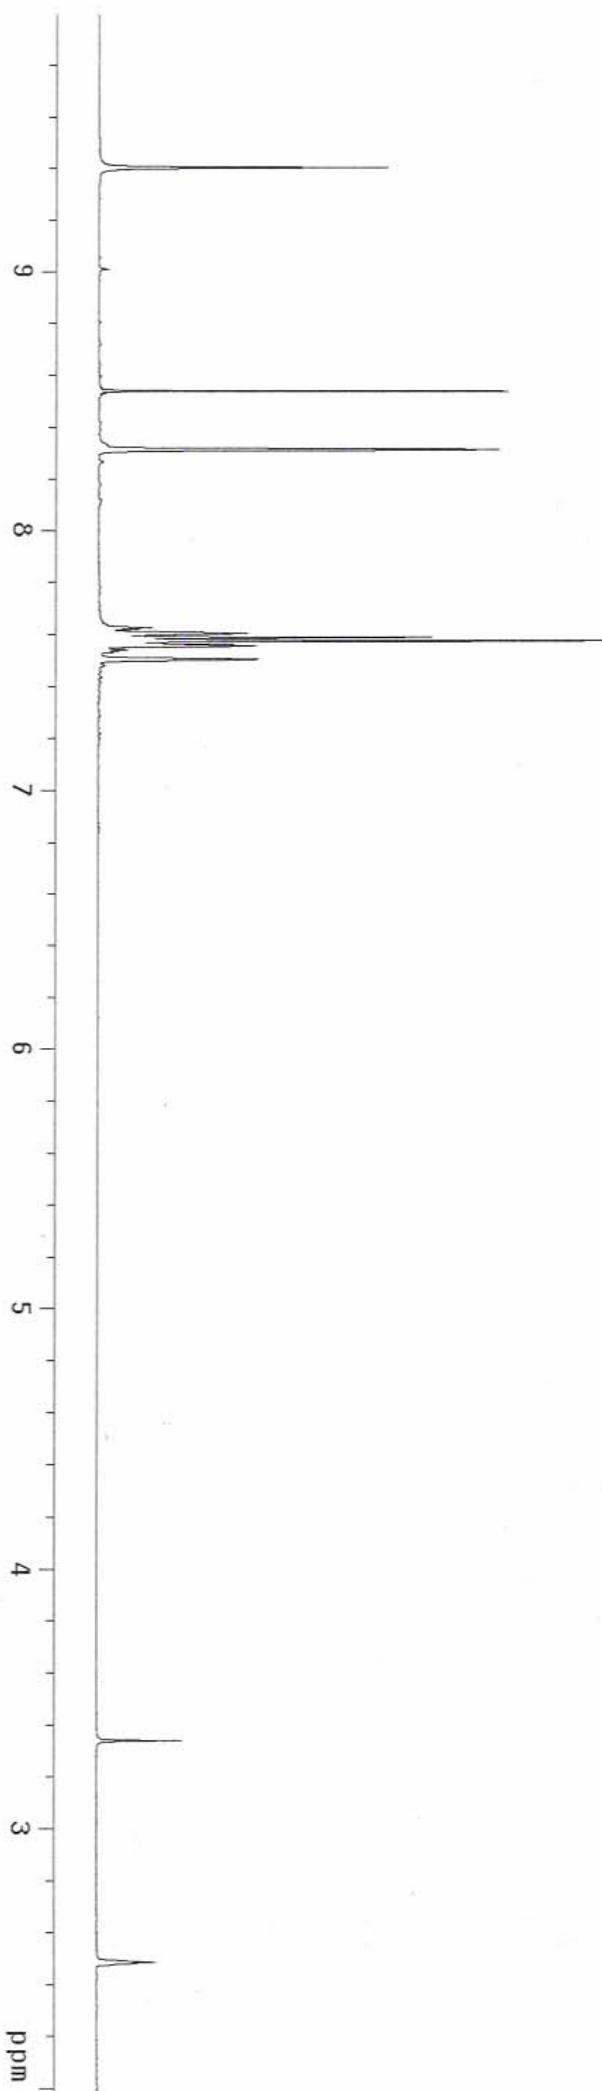

<sup>13</sup>CNMR, DMSO-d<sub>6</sub>, 100MHz

6f

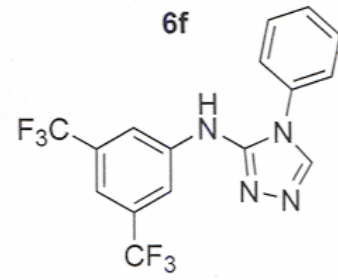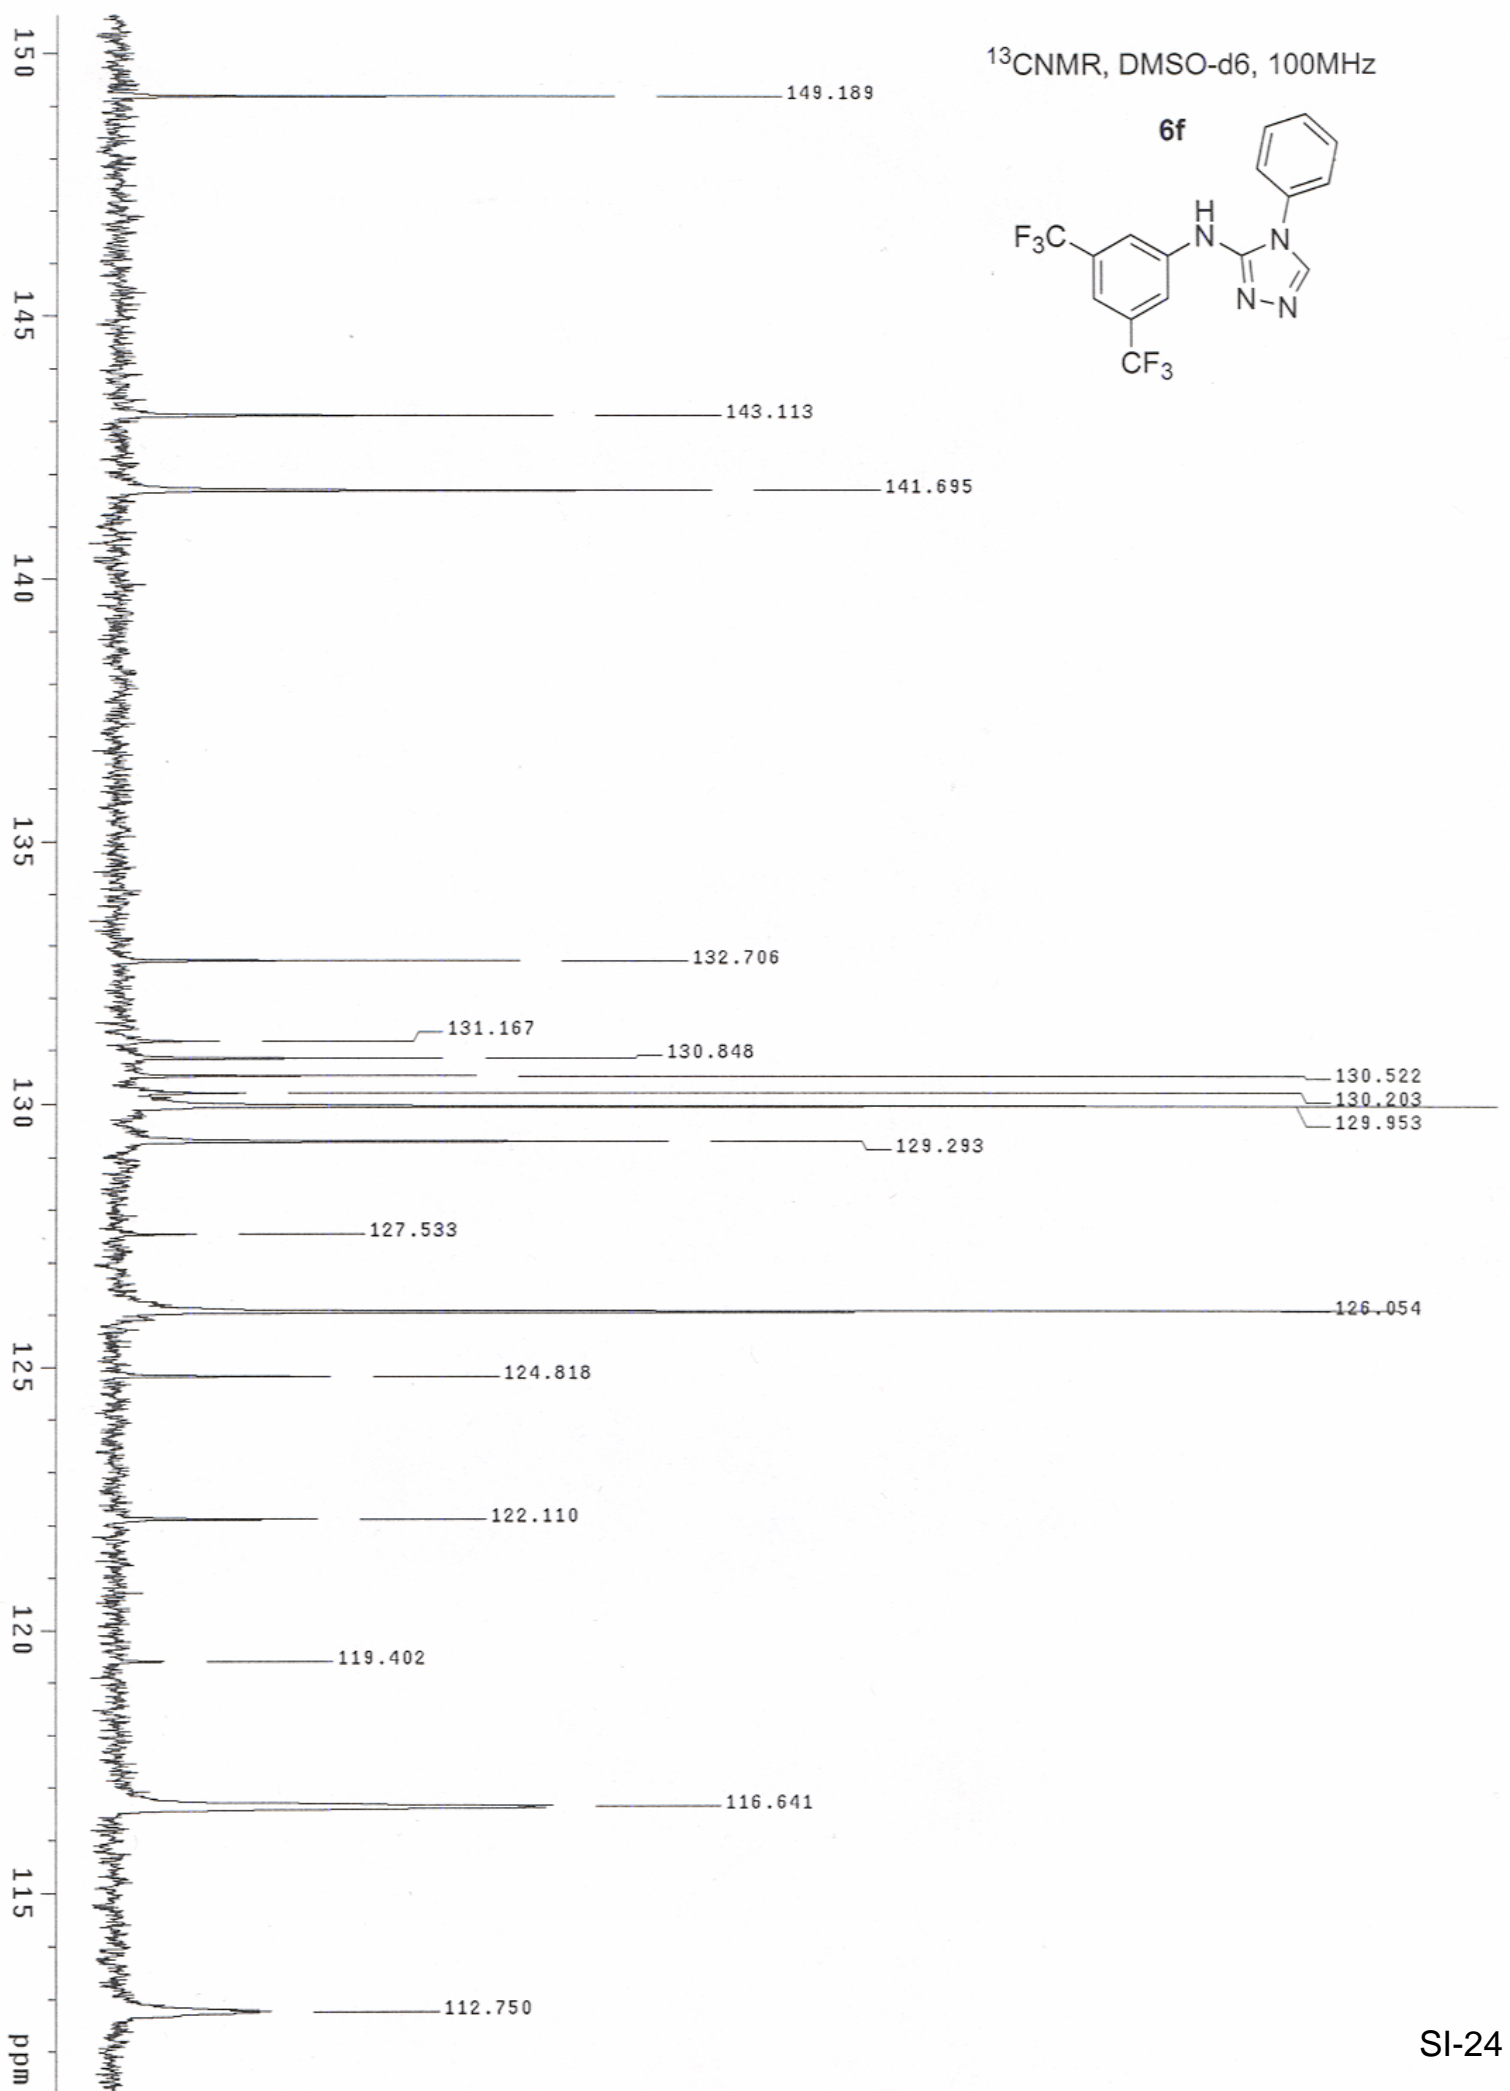



TOCSY

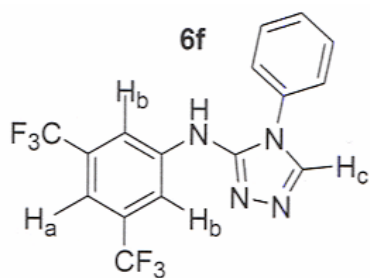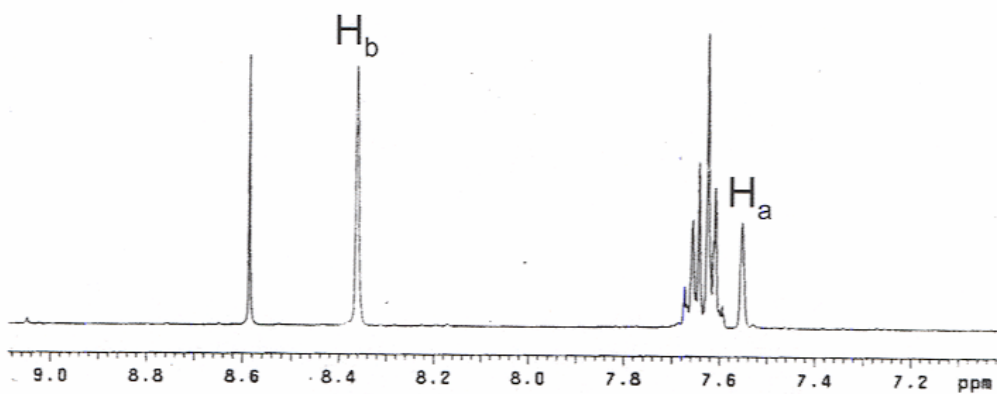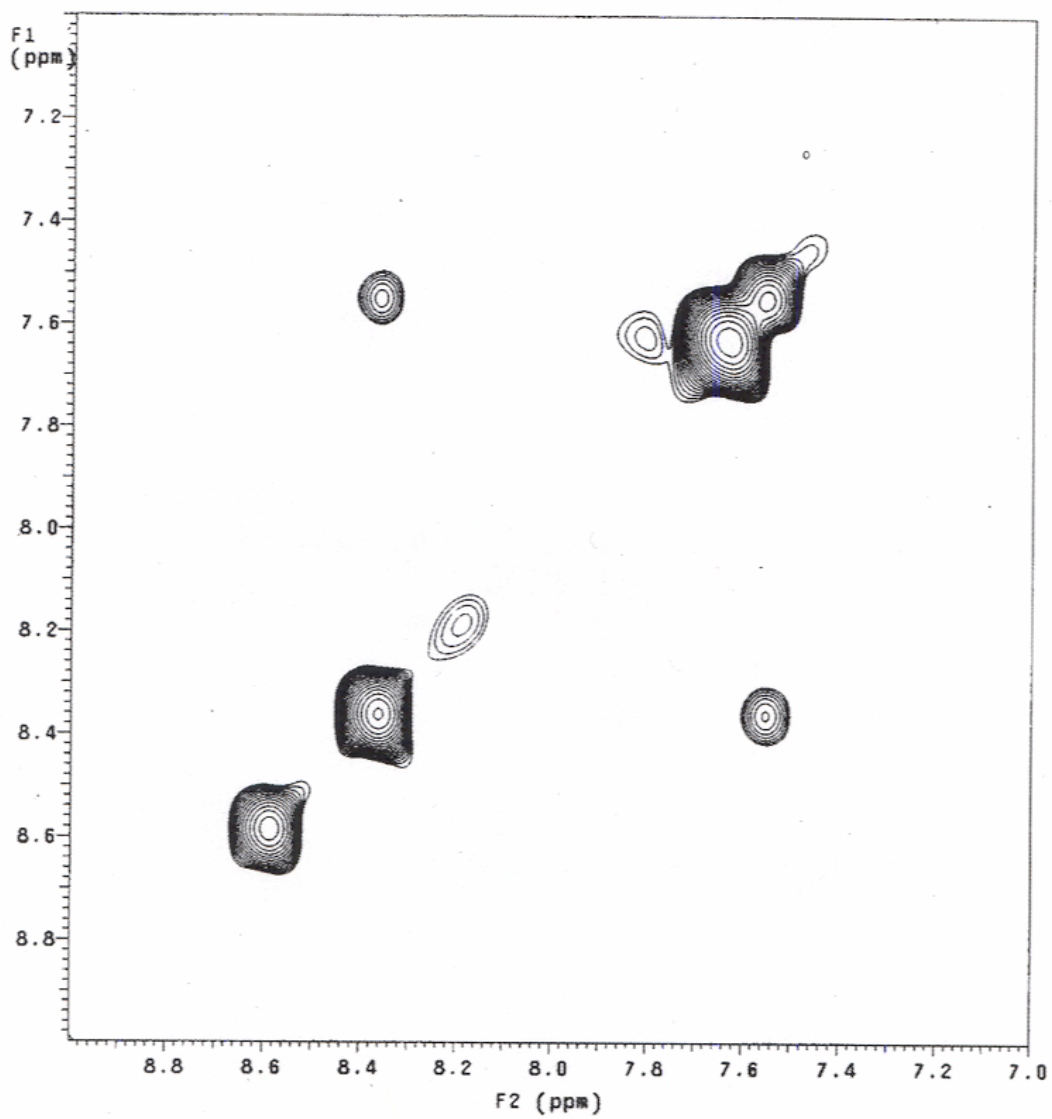

# NOESY

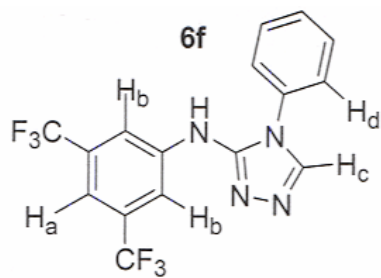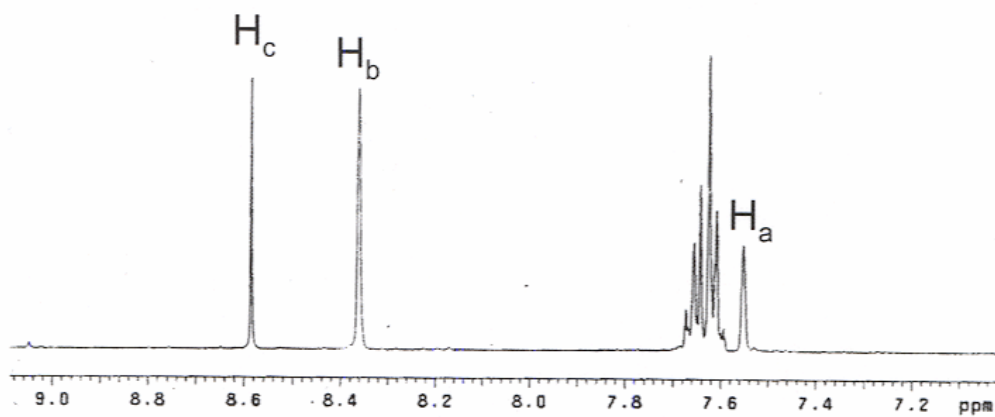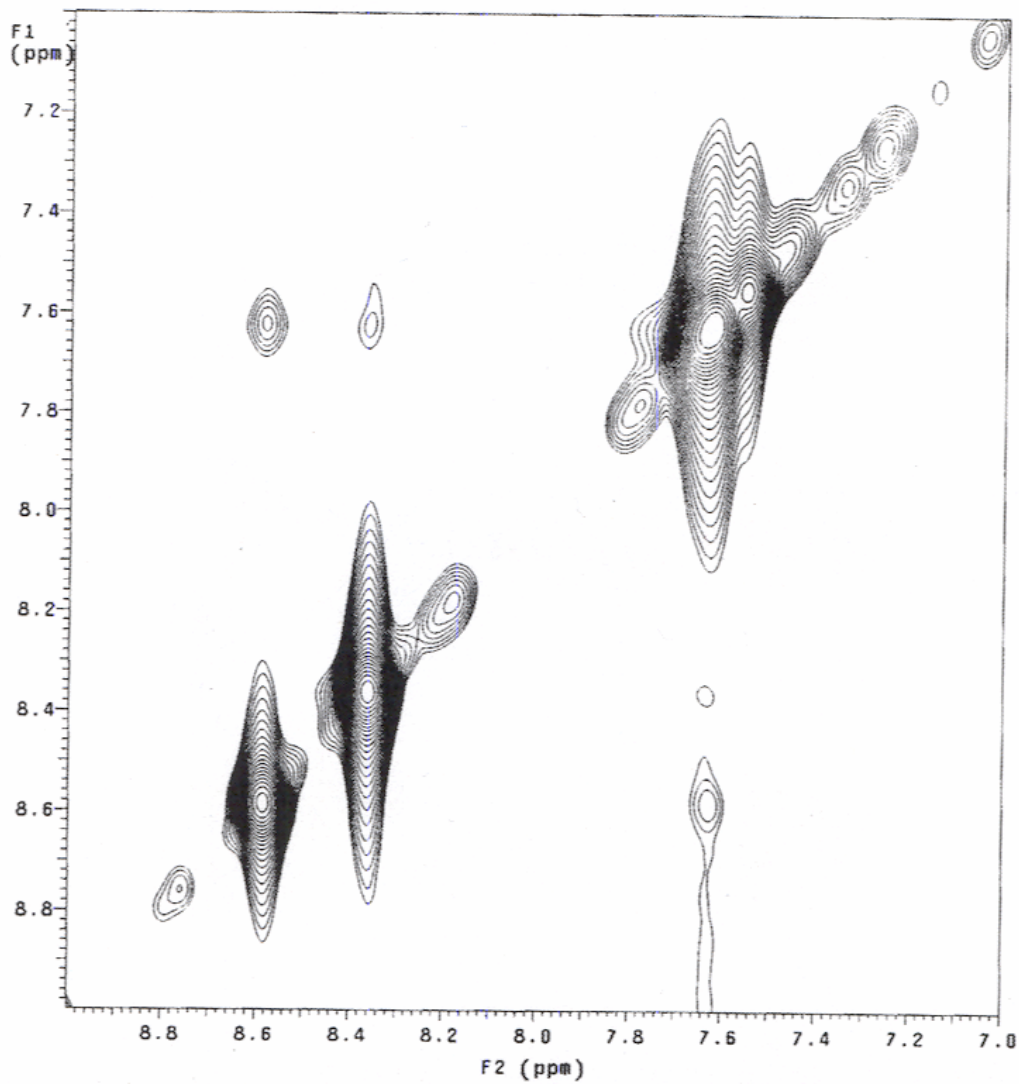

# TOCSY

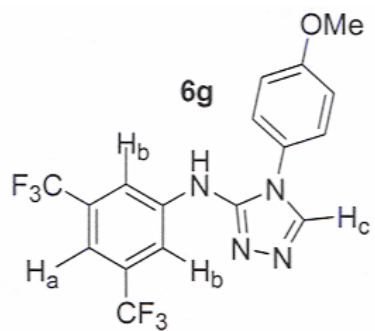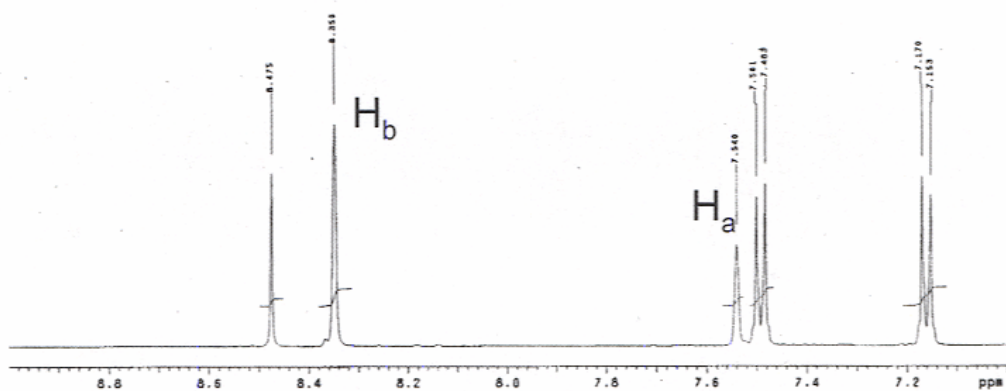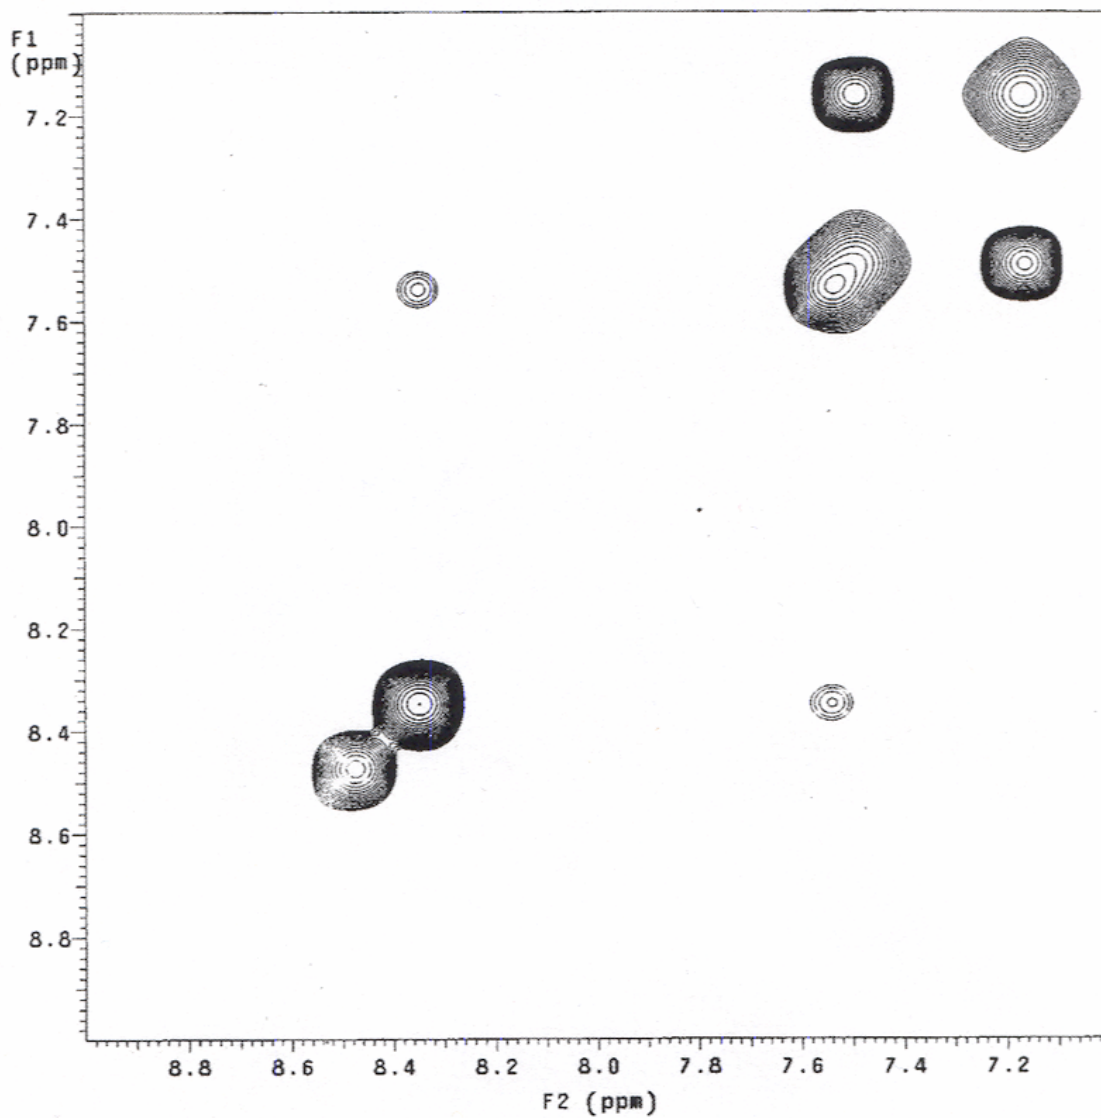

**General Procedure (I) for 1,3-diarylthioureas:** To 1 mmol of substituted phenylisothiocyanate in 2 mL dichloromethane, 1.05 mmol of the substituted aniline in 3 mL dichloromethane was added dropwise. The resulting mixture was allowed to stir at room temperature overnight. The product precipitates out and was filtered and washed with cold dichloromethane and was carried on to the next step without any purification. The following 1,3-disubstituted thioureas are known compounds or commercially available: **3b**,<sup>25</sup> **3d**, **3e**, **3f** and **5e**

**General Procedure (II) for studying the substituent effect on the synthesis of *N*-aryl-(4-aryl-4*H*-[1,2,4]triazole-3-yl)-amines:** To 1 mmol of 1,3-disubstituted thiourea a solution of 1.20 mmol of the hydrazide in 10 mL DMF/acetonitrile (1:1) was added and stirred to dissolve the thiourea. To this solution 0.95 mmol of mercury(II)acetate was added and allowed to stir at RT for 2h. A black precipitate (HgS) was formed over time. The precipitate was filtered and washed with acetonitrile. The filtrate was concentrated to yield a solid that was purified by either silica gel column chromatography (ethyl acetate/hexane and 1% methanol, 1:1) or by recrystallization dichloromethane-ethylacetate-hexanes to obtain the desired [1,2,4]triazole in good yields.

**General Procedure (III) for the synthesis of *N*-aryl-(4-aryl-4*H*-[1,2,4]triazole-3-yl)-amines:** To 1 mmol of 1,3-disubstituted thiourea 5 mmol of the hydrazide in 25 mL acetonitrile was added and stirred to dissolve. To this solution 1.5 mmol of mercury(II)acetate was added and allowed to stir at RT for 2-16 h. A black precipitate (HgS) was formed over time. The precipitate was filtered and washed with acetonitrile. The filtrate was concentrated to yield a solid that was purified by either silica gel column chromatography (ethyl acetate/hexane and 1% methanol, 1:1) or by recrystallization dichloromethane-ethylacetate-hexanes to obtain the desired [1,2,4]triazole in good yields.

**General Procedure for Pd/C debenylation:** To 1mmol of the 1-benzyl-1,3-diaryl-[1,2,4]triazole in 5 mL ethyl acetate/acetic acid (5:1), 10% Pd/C (25 mg) was added. The reaction was purged with nitrogen and stirred at RT at 40 psi H<sub>2</sub> overnight. The reaction mixture was filtered through a celite bed, the filtrate was concentrated under reduced pressure. The resulting material was purified by column chromatography (ethyl acetate/hexane and 1% methanol, 1:1).
